# Supplementary material for: Copper-catalysed enantioselective Michael addition of malonic esters to β-trifluoromethyl-α,β-unsaturated imines
Source: Royal Society of Chemistry journal article supplement (doi:10.1039/c7ob00595d), 2017-01-01
Supplement: c7ob00595d1.pdf [file c7ob00595d1.pdf]

## Copper-Catalysed Enantioselective Michael Addition of Malonic Esters to $\beta$ -Trifluoromethyl- $\alpha,\beta$ -Unsaturated Imines

Miguel Espinosa,<sup>a</sup> Jorge Herrera, Gonzalo Blay,<sup>\*a</sup> Luz Cardona, M.Carmen Muñoz,<sup>b</sup> and José R. Pedro<sup>\*a</sup>

*a* Departament de Química Orgànica, Facultat de Química, Universitat de València, C/Dr. Moliner, 50, E-46100 Burjassot (València), Spain

*b* Departament de Física Aplicada, Universitat Politècnica de València, Camí de Vera s/n, E-46022-València, Spain

### SUPPLEMENTARY INFORMATION

#### Table of Contents:

|                                                                                                                                      |     |
|--------------------------------------------------------------------------------------------------------------------------------------|-----|
| General Experimental Methods                                                                                                         | S2  |
| General procedure for the enantioselective conjugate addition and characterisation data for compounds <b>3</b>                       | S2  |
| Synthetic transformations of compound <b>3a</b>                                                                                      | S21 |
| References                                                                                                                           | S22 |
| NMR spectra and chiral analysis chromatograms for compounds <b>3</b>                                                                 | S23 |
| Ortep plot for the X-ray structure of compounds <b>2a</b> and <b>3a</b>                                                              | S52 |
| Table S-1. Enantioselective conjugate addition of dimethyl malonate to imine <b>2a</b> catalysed by trivalent metal-pyBOX complexes. | S53 |

## General Experimental Methods

Reactions were carried out under nitrogen in round bottom flasks oven-dried overnight at 120 °C. Commercial reagents were used as purchased. Dichloromethane was distilled from CaH<sub>2</sub>. 4 Å molecular sieves (8-12 mesh, beads Aldrich 208604) were dried at the flame under vacuum (oil pump) and stored in a closed flask and used before a week. Reactions were monitored by TLC analysis using Merck Silica Gel 60 F-254 thin layer plates. Flash column chromatography was performed on Merck silica gel 60, 0.040-0.063 mm. Melting points were determined in capillary tubes. NMR spectra were run at 300 MHz for <sup>1</sup>H and at 75 MHz for <sup>13</sup>C NMR using residual nondeuterated solvent (CHCl<sub>3</sub>) as internal standard (δ 7.26 and 77.0 ppm, respectively), and at 282 MHz for <sup>19</sup>F NMR using CFCl<sub>3</sub> as internal standard. Chemical shifts are given in ppm. The carbon type was determined by DEPT experiments. High resolution mass spectra (ESI) were recorded on a Q-TOF spectrometer equipped with an electrospray source with a capillary voltage of 3.3 kV (ESI). Specific optical rotations were measured using sodium light (D line 589 nm). Chiral HPLC analyses were performed in a chromatograph equipped with a UV diode-array detector using chiral stationary phase columns from Daicel or from Phenomenex. *N*-Tosyl unsaturated imines **2** were prepared according to the procedure described by A. D. Smith.<sup>1</sup>

### General procedure for the enantioselective conjugate addition of methyl malonate to β-trifluoromethyl α,β-unsaturated *N*-sulfonylimines **2**

Cu(OTf)<sub>2</sub> (4.5 mg, 0.0125 mmol) was dried in a Schlenk tube under vacuum. **BOX7** (4.4 mg, 0.0125 mmol) was added and the tube was filled with nitrogen. CH<sub>2</sub>Cl<sub>2</sub> (0.55 mL) was added via syringe and the mixture was stirred for 30 min. A solution of imine **2** (0.125 mmol) dissolved in dry CH<sub>2</sub>Cl<sub>2</sub> (0.5 mL), was added via syringe, followed by 4 Å MS (110 mg) and dimethyl malonate (34 μL, 0.3 mmol). The mixture was stirred at room temperature for the indicated time and chromatographed on silica gel eluting with hexane/EtOAc mixtures to give compounds **3**.

Racemic compounds for comparative purpose were prepared by following the same procedure, using La(OTf)<sub>3</sub>-pyBOX (rac) at 40 °C.

### Dimethyl (*S,E*)-2-(1,1,1-trifluoro-4-((4-methylphenyl)sulfonamido)-4-phenylbut-3-en-2-yl)malonate (**3a**)

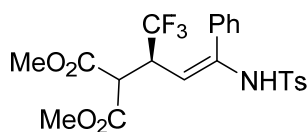

Chiral HPLC analysis: Chiralpak AD-H, hexane-*i*PrOH 80:20, 1 mL/min, *E*-diastereomer: *major enantiomer* (*S*) tr = 8.4 min, *minor enantiomer* (*R*) tr = 14.0 min; *Z*-diastereomer: *major enantiomer* tr = 12.4 min, *minor enantiomer* tr = 9.4 min.

**Major *E*-diastereomer:** White solid, m.p. 159-161 °C (hexane-EtOAc); [ $\alpha$ ]<sub>D</sub><sup>20</sup> -54.0 (*c* 1.0, CHCl<sub>3</sub>) for the mixture of diastereomers; white solid, M.p. 153.4-160.2 °C (hexane-

EtOAc);  $^1\text{H}$  NMR (300 MHz,  $\text{CDCl}_3$ )  $\delta$  7.76 (2H, d,  $J = 8.4$  Hz, Ar), 7.40-7.27 (5H, m, Ar), 7.10 (2H, m, Ar), 6.21 (1H, s, NH), 5.57 (1H, d,  $J = 10.8$  Hz, =CH), 3.73 (3H, s, MeO), 3.68 (1H, d,  $J = 8.4$  Hz,  $\text{CHCO}_2\text{Me}$ ), 3.64 (1H, m,  $\text{CHCF}_3$ ), 3.63 (3H, s, MeO), 2.45 (3H, s, Me-Ar);  $^{13}\text{C}$  NMR (75 MHz,  $\text{CDCl}_3$ )  $\delta$  166.7 (C), 166.4 (C), 144.2 (C), 141.3 (C), 135.9 (C), 134.0 (C), 129.6 (CH), 129.5 (CH), 128.7 (CH), 128.6 (CH), 127.7 (CH), 125.4 (C, q,  $J_{\text{C-F}} = 264.8$  Hz), 102.9 (CH, q,  $J_{\text{C-F}} = 2.4$  Hz), 52.93 ( $\text{CH}_3$ ), 52.90 ( $\text{CH}_3$ ), 51.0 (CH), 42.7 (CH, q,  $J_{\text{C-F}} = 27.9$  Hz), 21.5 ( $\text{CH}_3$ );  $^{19}\text{F}$  NMR (282 MHz,  $\text{CDCl}_3$ )  $\delta = -70.1$  (s,  $\text{CF}_3$ ) ppm; HRMS (ESI)  $m/z$  486.1197,  $\text{C}_{22}\text{H}_{23}\text{F}_3\text{NO}_6\text{S}$  requires 486.1193.

**Minor Z-diastereomer:**  $^1\text{H}$  NMR (300 MHz,  $\text{CDCl}_3$ )  $\delta$  7.95 (s, 1H), 7.59 (2H, d,  $J = 8.4$  Hz, Ar), 7.41 (2H, dd,  $J = 8.1, 1.5$  Hz, Ar), 7.36-7.26 (3H, m, Ar), 7.22 (2H, d,  $J = 8.4$  Hz, Ar), 5.22 (1H, d,  $J = 11.1$  Hz, =CH), 3.81 (3H, s, MeO), 3.76-3.48 (2H, m,  $\text{CHCF}_3$ ,  $\text{CHCO}_2\text{Me}$ ), 3.68 (3H, s, MeO), 2.39 (s, 3H);  $^{19}\text{F}$  NMR (282 MHz,  $\text{CDCl}_3$ )  $\delta = -69.8$  (s,  $\text{CF}_3$ ) ppm.

**Dimethyl (S,E)-2-(1,1,1-trifluoro-4-((4-methylphenyl)sulfonamido)-4-(p-tolyl)but-3-en-2-yl)malonate (3b)**

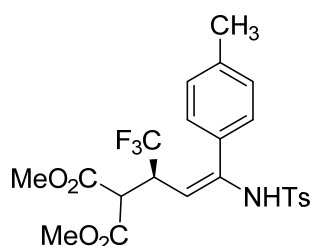

Chiral HPLC analysis: Lux Amylose-1, hexane-*i*PrOH 85:15, 1 mL/min, *E*-diastereomer: *major enantiomer* (*S*)  $t_r = 13.4$  min, *minor enantiomer* (*R*)  $t_r = 16.1$  min; *Z*-diastereomer: *major enantiomer*  $t_r = 14.5$  min, *minor enantiomer*  $t_r = 11.9$  min.

**Major E-diastereomer:** White solid, m.p. 138-146 °C (hexane-EtOAc);  $[\alpha]_{\text{D}}^{20} -38.6$  ( $c$  0.95,  $\text{CHCl}_3$ ) for the mixture of diastereomers;  $^1\text{H}$  NMR (300 MHz,  $\text{CDCl}_3$ )  $\delta$  7.75 (2H, d,  $J = 8.4$  Hz, Ar), 7.32 (2H, d,  $J = 8.4$  Hz, Ar), 7.13 (2H, d,  $J = 8.1$  Hz, Ar), 6.97 (2H, d,  $J = 8.1$  Hz, Ar), 6.18 (1H, s, NH), 5.52 (1H, d,  $J = 10.8$  Hz, =CH), 3.72 (3H, s, MeO), 3.67 (1H, d,  $J = 8.1$  Hz,  $\text{CHCO}_2\text{Me}$ ), 3.64 (1H, m,  $\text{CHCF}_3$ ), 3.63 (3H, s, MeO), 2.45 (3H, s, Me-Ar), 2.33 (3H, s, Me-Ar);  $^{13}\text{C}$  NMR (75 MHz,  $\text{CDCl}_3$ )  $\delta$  166.8 (C), 166.5 (C), 144.2 (C), 141.3 (C), 139.5 (C), 135.9 (C), 131.2 (C), 129.6 (CH), 129.5 (CH), 128.4 (CH), 127.7 (CH), 125.4 (C, q,  $J_{\text{C-F}} = 249.7$  Hz), 102.6 (CH, q,  $J_{\text{C-F}} = 2.0$  Hz), 52.94 ( $\text{CH}_3$ ), 52.91 ( $\text{CH}_3$ ), 51.0 (CH), 42.7 (CH, q,  $J_{\text{C-F}} = 27.9$  Hz), 21.5 ( $\text{CH}_3$ ), 21.3 ( $\text{CH}_3$ );  $^{19}\text{F}$  NMR (282 MHz,  $\text{CDCl}_3$ )  $\delta = -70.2$  (s,  $\text{CF}_3$ ) ppm; HRMS (ESI)  $m/z$  500.1356 ( $\text{M}+\text{H}$ ) $^+$   $\text{C}_{23}\text{H}_{25}\text{F}_3\text{NO}_6\text{S}$  requires 500.1349.

**Minor Z-diastereomer:**  $^1\text{H}$  NMR (300 MHz,  $\text{CDCl}_3$ ), representative signals taken from the  $^1\text{H}$  NMR of the diastereomer mixtures,  $\delta$  7.91 (1H, s, NH), 7.86 (2H, d,  $J = 8.1$  Hz, Ar), 7.60 (2H, d,  $J = 8.1$  Hz, Ar), 7.25 (2H, d,  $J = 8.1$  Hz, Ar), 7.22 (2H, d,  $J = 8.1$  Hz, Ar), 5.16 (1H, d,  $J = 10.8$  Hz, =CH), 3.82-3.60 (2H, m,  $\text{CHCF}_3$ ,  $\text{CHCO}_2\text{Me}$ ), 3.76 (3H, s, MeO), 3.67 (3H, s, MeO), 2.43 (3H, s, Me-Ar), 2.39 (3H, s, Me-Ar);  $^{19}\text{F}$  NMR (282 MHz,  $\text{CDCl}_3$ )  $\delta = -69.9$  (s,  $\text{CF}_3$ ) ppm.

**Dimethyl (S,E)-2-(4-(4-chlorophenyl)-1,1,1-trifluoro-4-((4-methylphenyl)sulfonamido)-but-3-en-2-yl)malonate (3c)**

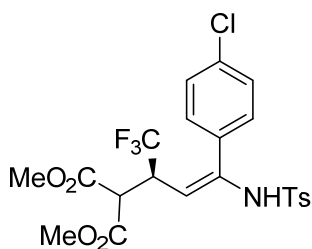

Chiral HPLC analysis: Lux Amylose-1, hexane-*i*PrOH 95:05, 1 mL/min, *E*-diastereomer: *major enantiomer* (*S*) *tr* = 38.4 min, *minor enantiomer* (*R*) *tr* = 47.9 min; *Z*-diastereomer: *major enantiomer* *tr* = 48.4 min, *minor enantiomer* *tr* = 33.9 min.

**Major *E*-diastereomer:** White solid, m.p. 142-150 °C (hexane-EtOAc);  $[\alpha]_D^{20}$  -21.3 (*c* 0.95, CHCl<sub>3</sub>) for the mixture of diastereomers; <sup>1</sup>H NMR (300 MHz, CDCl<sub>3</sub>) δ 7.70 (2H, d, *J* = 8.4 Hz, Ar), 7.34-7.24 (4H, m, Ar), 7.04 (2H, d, *J* = 8.7 Hz, Ar), 6.42 (1H, s, NH), 5.52 (1H, d, *J* = 10.8 Hz, =CH), 3.72 (3H, s, MeO), 3.67 (1H, d, *J* = 8.4 Hz, CHCO<sub>2</sub>Me), 3.64 (3H, s, MeO), 3.55 (1H, m, CHCF<sub>3</sub>), 2.44 (3H, s, Me-Ar); <sup>13</sup>C NMR (75 MHz, CDCl<sub>3</sub>) δ 166.6 (C), 166.5 (C), 144.3 (C), 140.4 (C), 135.9 (C), 135.6 (C), 132.3 (C), 130.2 (CH), 129.7 (CH), 129.0 (CH), 127.6 (CH), 125.4 (C, q, *J*<sub>C-F</sub> = 278 Hz), 104.23 (CH, q, *J*<sub>C-F</sub> = 2.5 Hz), 53.04 (CH<sub>3</sub>), 52.99 (CH<sub>3</sub>), 50.9 (CH), 42.6 (CH, q, *J*<sub>C-F</sub> = 28.0 Hz), 21.6 (CH<sub>3</sub>); <sup>19</sup>F NMR (282 MHz, CDCl<sub>3</sub>) δ = -70.1 (s, CF<sub>3</sub>) ppm; HRMS (ESI) *m/z* 520.0795 (M+H)<sup>+</sup>, C<sub>22</sub>H<sub>22</sub>ClF<sub>3</sub>NO<sub>6</sub>S requires 520.0803.

**Minor *Z*-diastereomer:** <sup>1</sup>H NMR (300 MHz, CDCl<sub>3</sub>), representative signals taken from the <sup>1</sup>H NMR of the diastereomer mixtures, δ 8.01 (1H, s, NH), 7.57 (2H, d, *J* = 8.4 Hz, Ar), 7.40-7.19 (6H, m, Ar), 5.19 (1H, d, *J* = 11.4 Hz, =CH), 3.80 (3H, s, MeO), 3.76 (1H, d, *J* = 7.2 Hz, CHCO<sub>2</sub>Me), 3.68 (3H, s, MeO), 3.51 (1H, m, CHCF<sub>3</sub>), 2.39 (3H, s, Me-Ar); <sup>19</sup>F NMR (282 MHz, CDCl<sub>3</sub>) δ = -69.8 (s, CF<sub>3</sub>) ppm.

**Dimethyl (S,E)-2-(4-(4-bromophenyl)-1,1,1-trifluoro-4-((4-methylphenyl)sulfonamido)but-3-en-2-yl)malonate (3d)**

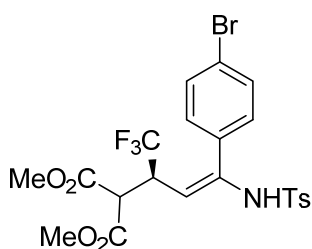

Chiral HPLC analysis: Chiralpak IC, hexane-*i*PrOH 95:05, 1 mL/min, *E*-diastereomer: *major enantiomer* (*S*) *tr* = 47.9 min, *minor enantiomer* (*R*) *tr* = 57.1 min; *Z*-diastereomer: *major enantiomer* *tr* = 31.9 min, *minor enantiomer* *tr* = 40.2 min.

**Major *E*-diastereomer:** Yellow solid, m.p. 130-133 °C (hexane-EtOAc);  $[\alpha]_D^{20}$  -12.8 (*c* 1.02, CHCl<sub>3</sub>) for the mixture of diastereomers; <sup>1</sup>H NMR (300 MHz, CDCl<sub>3</sub>) δ 7.71 (2H, d, *J* = 8.4 Hz, Ar), 7.45 (2H, d, *J* = 8.4 Hz, Ar), 7.31 (2H, d, *J* = 8.4 Hz, Ar), 7.04 (2H, d, *J* = 8.4 Hz, Ar), 6.29 (1H, s, NH), 5.53 (1H, d, *J* = 10.8 Hz, =CH), 3.73 (3H, s, MeO), 3.68 (1H, d, *J* = 8.4 Hz, CHCO<sub>2</sub>Me), 3.65 (3H, s, MeO), 3.55 (1H, m, CHCF<sub>3</sub>), 2.45 (3H, s, Me-Ar); <sup>13</sup>C NMR (75 MHz, CDCl<sub>3</sub>) δ 166.6 (C), 166.5 (C), 144.4 (C), 140.4 (C), 135.9 (C), 132.8 (C), 132.0 (CH), 130.4 (CH), 129.7 (CH), 127.6 (CH), 125.4 (C, q, *J*<sub>C-F</sub> = 278 Hz), 124.0 (C), 104.3 (CH, q, *J*<sub>C-F</sub> = 2.3 Hz), 53.07 (CH<sub>3</sub>), 53.01

(CH<sub>3</sub>), 50.9 (CH), 42.6 (CH, q,  $J_{C-F}$  = 28.0 Hz), 21.6 (CH<sub>3</sub>); <sup>19</sup>F NMR (282 MHz, CDCl<sub>3</sub>)  $\delta$  = -70.0 (s, CF<sub>3</sub>) ppm; HRMS (ESI)  $m/z$  564.0295 (M+H)<sup>+</sup>, C<sub>22</sub>H<sub>22</sub>BrF<sub>3</sub>NO<sub>6</sub>S requires 564.0298.

**Minor Z-diastereomer:** <sup>1</sup>H NMR (300 MHz, CDCl<sub>3</sub>), representative signals taken from the <sup>1</sup>H NMR of the diastereomer mixtures,  $\delta$  8.01 (1H, s, NH), 7.58 (2H, d,  $J$  = 8.4 Hz, Ar), 7.41 (2H, d,  $J$  = 8.4 Hz, Ar), 7.31 (2H, d,  $J$  = 8.4 Hz, Ar), 7.25 (2H, d,  $J$  = 8.4 Hz, Ar), 5.21 (1H, d,  $J$  = 11.4 Hz, =CH), 3.80 (3H, s, MeO), 3.77 (1H, d,  $J$  = 7.2 Hz, CHCO<sub>2</sub>Me), 3.68 (3H, s, MeO), 3.52 (1H, m, CHCF<sub>3</sub>), 2.40 (3H, s, Me-Ar); <sup>19</sup>F NMR (282 MHz, CDCl<sub>3</sub>)  $\delta$  = -69.8 (s, CF<sub>3</sub>) ppm.

**Dimethyl (S,E)-2-(1,1,1-trifluoro-4-((4-methylphenyl)sulfonamido)-4-nitrophenyl)but-3-en-2-yl)malonate (3e)**

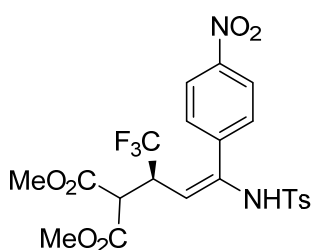

Chiral HPLC analysis: Chiralpak IC, hexane-*i*PrOH 90:10, 1 mL/min, *E*-diastereomer: *major enantiomer* (*S*)  $t_r$  = 60.4 min, *minor enantiomer* (*R*)  $t_r$  = 69.2 min; *Z*-diastereomer: *major enantiomer*  $t_r$  = 50.2 min, *minor enantiomer*  $t_r$  = 94.8 min.

**Major E-diastereomer:** Orange oil;  $[\alpha]_D^{20}$  1.1 ( $c$  1.0, CHCl<sub>3</sub>) for the mixture of diastereomers; <sup>1</sup>H NMR (300 MHz, CDCl<sub>3</sub>)  $\delta$  8.14 (2H, d,  $J$  = 9.0 Hz, Ar), 7.68 (2H, d,  $J$  = 8.1 Hz, Ar), 7.37-7.28 (4H, m, Ar), 6.80 (1H, s, NH), 5.58 (1H, d,  $J$  = 11.1 Hz, =CH), 3.73 (3H, s, MeO), 3.68 (1H, d,  $J$  = 8.4 Hz, CHCO<sub>2</sub>Me), 3.65 (3H, s, MeO), 3.49 (1H, m, CHCF<sub>3</sub>), 2.45 (3H, s, Me-Ar); <sup>13</sup>C NMR (75 MHz, CDCl<sub>3</sub>)  $\delta$  166.5 (C), 166.4 (C), 148.2 (C), 144.6 (C), 140.1 (C), 139.6 (C), 135.7 (C), 130.2 (CH), 129.7 (CH), 127.6 (CH), 125.2 (C, q,  $J_{C-F}$  = 279 Hz), 123.8 (C), 106.5 (CH, q,  $J_{C-F}$  = 2.1 Hz), 53.2 (CH<sub>3</sub>), 53.1 (CH<sub>3</sub>), 50.7 (CH), 42.6 (CH, q,  $J_{C-F}$  = 28.2 Hz), 21.6 (CH<sub>3</sub>); <sup>19</sup>F NMR (282 MHz, CDCl<sub>3</sub>)  $\delta$  = -69.9 (s, CF<sub>3</sub>) ppm; HRMS (ESI)  $m/z$  531.1034 (M+H)<sup>+</sup>, C<sub>22</sub>H<sub>22</sub>ClF<sub>3</sub>N<sub>2</sub>O<sub>8</sub>S requires 531.1043.

**Minor Z-diastereomer:** <sup>1</sup>H NMR (300 MHz, CDCl<sub>3</sub>), representative signals taken from the <sup>1</sup>H NMR of the diastereomer mixture,  $\delta$  8.19 (1H, s, NH), 8.14 (2H, d,  $J$  = 9.0 Hz, Ar), 7.60 (4H, m, Ar), 7.25 (2H, d,  $J$  = 8.0 Hz, Ar), 5.40 (1H, d,  $J$  = 10.8 Hz, =CH), 3.83 (3H, s, MeO), 3.80 (1H, d,  $J$  = 5.7 Hz, CHCO<sub>2</sub>Me), 3.69 (3H, s, MeO), 3.49 (1H, m, CHCF<sub>3</sub>), 2.40 (3H, s, Me-Ar); <sup>13</sup>C NMR (75 MHz, CDCl<sub>3</sub>)  $\delta$  168.2 (C), 166.9 (C), 148.2 (C), 144.4 (C), 143.2 (C), 140.0 (C), 136.5 (C), 129.7 (CH), 128.7 (CH), 126.9 (CH), 125.2 (C, q,  $J_{C-F}$  = 279 Hz), 123.3 (C), 114.8 (CH, q,  $J_{C-F}$  = 2.1 Hz), 54.0 (CH<sub>3</sub>), 53.4 (CH<sub>3</sub>), 50.7 (CH), 41.8 (CH, q,  $J_{C-F}$  = 29.0 Hz), 21.4 (CH<sub>3</sub>); <sup>19</sup>F NMR (282 MHz, CDCl<sub>3</sub>)  $\delta$  = -69.9 (s, CF<sub>3</sub>) ppm; <sup>19</sup>F NMR (282 MHz, CDCl<sub>3</sub>)  $\delta$  = -69.6 (s, CF<sub>3</sub>) ppm.

**Dimethyl (*S,E*)-2-(1,1,1-trifluoro-4-(4-methoxyphenyl)-4-((4-methylphenyl)sulfonamido)but-3-en-2-yl)malonate (3f)**

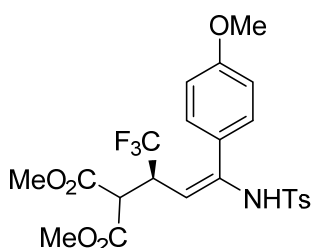

Chiral HPLC analysis: Chiralpak IC, hexane-*i*PrOH 90:10, 1 mL/min, *E*-diastereomer: *major enantiomer (S)* tr = 44.2 min, *minor enantiomer (R)* tr = 63.8 min; *Z*-diastereomer: *major enantiomer* tr = 38.0 min, *minor enantiomer* tr = 50.9 min.

**Major *E*-diastereomer:** Yellow oil;  $[\alpha]_D^{20}$  -16.3 (*c* 1.0, CHCl<sub>3</sub>) for the mixture of diastereomers; <sup>1</sup>H NMR (300 MHz, CDCl<sub>3</sub>) δ 7.75 (2H, d, *J* = 8.1 Hz, Ar), 7.32 (2H, d, *J* = 8.1 Hz, Ar), 7.03 (2H, d, *J* = 8.7 Hz, Ar), 6.84 (2H, d, *J* = 8.7 Hz, Ar), 6.16 (1H, s, NH), 5.48 (1H, d, *J* = 10.8 Hz, =CH), 3.79-3.66 (2H, m, CH-CF<sub>3</sub>, CHCO<sub>2</sub>Me), 3.80 (3H, s, MeO), 3.73 (3H, s, MeO), 3.64 (3H, s, MeO), 2.45 (3H, s, Me-Ar); <sup>13</sup>C NMR (75 MHz, CDCl<sub>3</sub>) δ 166.8 (C), 166.5 (C), 160.3 (C), 144.1 (C), 141.2 (C), 136.0 (C), 130.0 (CH), 129.6 (CH), 127.7 (CH), 125.6 (C, q, *J*<sub>C-F</sub> = 279 Hz, CF<sub>3</sub>), 114.1 (CH), 102.7 (C, q, *J*<sub>C-F</sub> = 2.0 Hz, CF<sub>3</sub>), 55.2 (CH<sub>3</sub>), 52.96 (CH<sub>3</sub>), 52.91 (CH<sub>3</sub>), 51.1 (CH), 42.6 (CH, q, *J*<sub>C-F</sub> = 27.8 Hz, CF<sub>3</sub>), 21.6 (CH<sub>3</sub>); <sup>19</sup>F NMR (282 MHz, CDCl<sub>3</sub>) δ = -70.2 (s, CF<sub>3</sub>) ppm; HRMS (ESI) *m/z* 516.1294 (M+H)<sup>+</sup>, C<sub>23</sub>H<sub>25</sub>F<sub>3</sub>NO<sub>7</sub>S requires 516.1298.

**Minor *Z*-diastereomer:** <sup>1</sup>H NMR (300 MHz, CDCl<sub>3</sub>), representative signals taken from the <sup>1</sup>H NMR of the diastereomer mixture, δ 7.60 (2H, d, *J* = 8.1 Hz, Ar), 7.23 (2H, d, *J* = 8.1 Hz, Ar), 6.93 (2H, d, *J* = 9.0 Hz, Ar), 6.79 (2H, d, *J* = 9.0 Hz, Ar), 5.09 (1H, d, *J* = 11.4 Hz, =CH), 2.43 (3H, s, Me-Ar); <sup>19</sup>F NMR (282 MHz, CDCl<sub>3</sub>) δ = -69.9 (s, CF<sub>3</sub>) ppm.

**Dimethyl (*S,E*)-2-(1,1,1-trifluoro-4-((4-methylphenyl)sulfonamido)-4-(*m*-tolyl)but-3-en-2-yl)malonate (3g)**

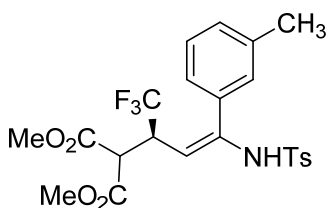

Chiral HPLC analysis: Lux Amylose-1, hexane-*i*PrOH 80:20, 1 mL/min, *E*-diastereomer: *major enantiomer (S)* tr = 7.0 min, *minor enantiomer (R)* tr = 10.7 min; *Z*-diastereomer: *major enantiomer* tr = 9.5 min, *minor enantiomer* tr = 7.8 min.

**Major *E*-diastereomer:** White solid, m.p. 117-120 °C (hexane-EtOAc);  $[\alpha]_D^{20}$  -40.7 (*c* 1.0, CHCl<sub>3</sub>) for the mixture of diastereomers; <sup>1</sup>H NMR(300 MHz, CDCl<sub>3</sub>) δ 7.75 (2H, d, *J* = 8.1 Hz, Ar), 7.32 (2H, d, *J* = 8.1 Hz, Ar), 7.21-7.13 (2H, m, Ar), 6.89 (1H, d, *J* = 7.5 Hz, Ar), 6.81 (1H, s, Ar), 6.18 (1H, s, NH), 5.55 (1H, d, *J* = 10.8 Hz, =CH), 3.76-3.67 (2H, m, CH-CF<sub>3</sub>, CHCO<sub>2</sub>Me), 3.73 (3H, s, MeO), 3.63 (3H, s, MeO), 2.45 (3H, s, Me-Ar), 2.28 (3H, s, Me-Ar); <sup>13</sup>C NMR (75 MHz, CDCl<sub>3</sub>) δ 166.8 (C), 166.5 (C), 144.2 (C), 141.4 (C), 138.5 (C), 136.0 (C), 134.0 (C), 130.2 (CH), 129.6 (CH), 129.1 (CH), 128.7 (CH), 127.7 (CH), 125.6 (CH), 125.4 (C, q, *J*<sub>C-F</sub> = 255 Hz), 102.9 (CH, q, *J*<sub>C-F</sub> = 2.0 Hz), 52.93 (CH<sub>3</sub>), 52.91 (CH<sub>3</sub>), 51.1 (CH), 42.6 (CH, q, *J*<sub>C-F</sub> = 27.9 Hz), 21.5 (CH<sub>3</sub>), 21.3 (CH<sub>3</sub>); <sup>19</sup>F NMR (282 MHz, CDCl<sub>3</sub>) δ = -70.2 (s, CF<sub>3</sub>) ppm; HRMS (ESI) *m/z* 500.1354 (M+H)<sup>+</sup>, C<sub>23</sub>H<sub>25</sub>F<sub>3</sub>NO<sub>6</sub>S requires 500.1349.

**Minor Z-diastereomer:**  $^1\text{H}$  NMR (300 MHz,  $\text{CDCl}_3$ ), representative signals taken from the  $^1\text{H}$  NMR of the diastereomer mixture,  $\delta$  7.90 (1H, s, NH), 7.58 (2H, d,  $J = 8.4$  Hz, Ar), 7.35-6.75 (6H, m, Ar), 5.22 (1H, d,  $J = 11.4$  Hz, =CH), 3.82-3.60 (2H, m,  $\text{CH}-\text{CF}_3$ ,  $\text{CHCO}_2\text{Me}$ ), 3.80 (3H, s, MeO), 3.68 (3H, s, MeO), 2.43 (3H, s, Me-Ar), 2.26 (3H, s, Me-Ar);  $^{19}\text{F}$  NMR (282 MHz,  $\text{CDCl}_3$ )  $\delta = -69.8$  (s,  $\text{CF}_3$ ) ppm.

**Dimethyl (*S,E*)-2-(4-(3-chlorophenyl)-1,1,1-trifluoro-4-((4-methylphenyl)sulfonamido)but-3-en-2-yl)malonate (3h)**

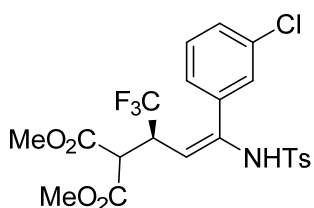

Chiral HPLC analysis: Lux Amylose-1, hexane-*i*PrOH 80:20, 1 mL/min, *E*-diastereomer: *major enantiomer* (*S*)  $t_r = 7.2$  min, *minor enantiomer* (*R*)  $t_r = 11.1$  min; *Z*-diastereomer: *major enantiomer*  $t_r = 9.5$  min, *minor enantiomer*  $t_r = 8.2$  min.

**Major *E*-diastereomer:** yellow solid, m.p. 100-107 °C (hexane-EtOAc);  $[\alpha]_{\text{D}}^{20} -20.8$  ( $c$  0.96,  $\text{CHCl}_3$ ) for the mixture of diastereomers;  $^1\text{H}$  NMR (300 MHz,  $\text{CDCl}_3$ )  $\delta$  7.71 (2H, d,  $J = 8.4$  Hz, Ar), 7.32 (2H, d,  $J = 8.4$  Hz, Ar), 7.31-7.17 (2H, m, Ar), 7.05 (1H, dt,  $J = 7.2, 1.5$  Hz, Ar), 6.93 (1H, t,  $J = 1.5$  Hz, Ar), 6.34 (1H, s, NH), 5.58 (1H, d,  $J = 10.8$  Hz, =CH), 3.74 (3H, s, MeO), 3.68 (1H, d,  $J = 8.1$  Hz,  $\text{CHCO}_2\text{Me}$ ), 3.64 (3H, s, MeO), 3.56 (1H, m,  $\text{CHCF}_3$ ), 2.45 (3H, s, Me-Ar);  $^{13}\text{C}$  NMR (75 MHz,  $\text{CDCl}_3$ )  $\delta$  166.6 (C), 166.4 (C), 144.4 (C), 140.1 (C), 135.8 (C), 135.5 (C), 134.5 (C), 130.0 (CH), 129.7 (CH), 129.6 (CH), 128.8 (CH), 127.6 (CH), 127.0 (CH), 125.4 (C, q,  $J_{\text{C-F}} = 280$  Hz), 104.9 (CH, q,  $J_{\text{C-F}} = 2.0$  Hz), 53.03 ( $\text{CH}_3$ ), 52.98 ( $\text{CH}_3$ ), 50.9 (CH), 42.6 (CH, q,  $J_{\text{C-F}} = 28.0$  Hz), 21.5 ( $\text{CH}_3$ );  $^{19}\text{F}$  NMR (282 MHz,  $\text{CDCl}_3$ )  $\delta = -70.0$  (s,  $\text{CF}_3$ ) ppm; HRMS (ESI)  $m/z$  520.0801 ( $\text{M}+\text{H}$ ) $^+$ ,  $\text{C}_{22}\text{H}_{22}\text{ClF}_3\text{NO}_6\text{S}$  requires 520.0803.

**Minor *Z*-diastereomer:**  $^1\text{H}$  NMR (300 MHz,  $\text{CDCl}_3$ ), representative signals taken from the  $^1\text{H}$  NMR of the diastereomer mixture,  $\delta$  8.00 (1H, s, NH), 7.57 (2H, d,  $J = 8.4$  Hz, Ar), 7.33-7.20 (6H, m, Ar), 5.26 (1H, dd,  $J = 10.8, 0.6$  Hz, =CH), 3.81 (3H, s, MeO), 3.78 (1H, d,  $J = 6.3$  Hz,  $\text{CHCO}_2\text{Me}$ ), 3.69 (3H, s, MeO), 3.56 (1H, m,  $\text{CH}-\text{CF}_3$ ), 2.39 (3H, s, Me-Ar);  $^{19}\text{F}$  NMR (282 MHz,  $\text{CDCl}_3$ )  $\delta = -69.7$  (s,  $\text{CF}_3$ ) ppm.

**Dimethyl (*S,E*)-2-(1,1,1-trifluoro-4-((4-methylphenyl)sulfonamido)-4-(3-nitrophenyl)but-3-en-2-yl)malonate (3i)**

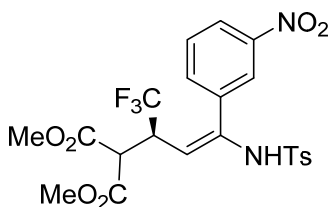

Chiral HPLC analysis: Lux Amylose-1, hexane-*i*PrOH 95:05, 2 mL/min, *E*-diastereomer: *major enantiomer* (*S*)  $t_r = 42.9$  min, *minor enantiomer* (*R*)  $t_r = 78.2$  min; *Z*-diastereomer: *major enantiomer*  $t_r = 50.6$  min, *minor enantiomer*  $t_r = 30.9$  min.

**Major *E*-diastereomer:** Yellow oil;  $[\alpha]_{\text{D}}^{20} -9.5$  ( $c$  0.97,  $\text{CHCl}_3$ ) for the mixture of diastereomers;  $^1\text{H}$  NMR (300 MHz,  $\text{CDCl}_3$ )  $\delta$  8.18 (1H, m, Ar), 7.82 (1H, ddd,  $J = 7.8, 1.8, 1.2$  Hz, Ar), 7.76 (1H, t,  $J = 1.8$  Hz, Ar), 7.65 (2H, d,  $J = 8.0$  Hz, Ar), 7.54 (1H, t,  $J = 8.0$  Hz, Ar), 7.30 (2H, d,  $J = 8.0$  Hz, Ar), 6.62 (1H, s, NH), 5.63 (1H, d,  $J = 11.1$  Hz, =CH), 3.76 (3H, s, MeO), 3.67 (1H, d,  $J = 7.4$  Hz,  $\text{CHCO}_2\text{Me}$ ), 3.65 (3H, s, MeO), 3.48 (1H, m,  $\text{CHCF}_3$ ), 2.44 (3H, s, Me-Ar);  $^{13}\text{C}$  NMR (75 MHz,  $\text{CDCl}_3$ )  $\delta$  166.5 (C), 166.4

(C), 148.1 (C), 144.7 (C), 139.5 (C), 135.7 (C), 135.2 (CH), 135.1 (C), 129.8 (CH, overlapped signals), 127.5 (CH), 125.3 (C, q,  $J_{C-F} = 279$  Hz), 124.2 (CH), 124.1 (CH), 106.9 (CH, q,  $J_{C-F} = 2.0$  Hz), 53.17 (CH<sub>3</sub>), 53.12 (CH<sub>3</sub>), 50.7 (CH), 42.6 (CH, q,  $J_{C-F} = 28.2$  Hz), 21.5 (CH<sub>3</sub>); <sup>19</sup>F NMR (282 MHz, CDCl<sub>3</sub>)  $\delta = -69.9$  (s, CF<sub>3</sub>) ppm; HRMS (ESI)  $m/z$  531.1036 (M+H)<sup>+</sup>, C<sub>22</sub>H<sub>22</sub>ClF<sub>3</sub>N<sub>2</sub>O<sub>8</sub>S requires 531.1043.

**Minor Z-diastereomer:** <sup>1</sup>H NMR (300 MHz, CDCl<sub>3</sub>), representative signals taken from the <sup>1</sup>H NMR of the diastereomer mixture,  $\delta$  8.19 (1H, s, NH), 8.16 (1H, m, Ar), 8.11 (1H, t,  $J = 1.9$  Hz, Ar), 7.63-7.53 (3H, m, Ar), 7.50 (1H, t,  $J = 8.1$  Hz, Ar), 7.23 (2H, d,  $J = 8.0$  Hz, Ar), 5.38 (1H, dd,  $J = 10.8, 0.6$  Hz, =CH), 3.83 (3H, s, MeO), 3.81 (1H, d,  $J = 6.3$  Hz, CHCO<sub>2</sub>Me), 3.71 (3H, s, MeO), 3.58 (1H, m, CH-CF<sub>3</sub>), 2.39 (3H, s, Me-Ar); <sup>13</sup>C NMR (75 MHz, CDCl<sub>3</sub>)  $\delta$  168.2 (C), 167.0 (C), 148.0 (C), 144.4 (C), 139.8 (C), 138.5 (C), 136.6 (C), 134.1 (CH), 129.7 (CH), 129.2 (CH), 126.9 (CH), 125.3 (C, q,  $J_{C-F} = 279$  Hz), 123.9 (CH), 122.7 (CH), 113.8 (CH, q,  $J_{C-F} = 2.4$  Hz), 54.0 (CH<sub>3</sub>), 53.4 (CH<sub>3</sub>), 50.7 (CH), 41.9 (CH, q,  $J_{C-F} = 28.29$  Hz), 21.4 (CH<sub>3</sub>); <sup>19</sup>F NMR (282 MHz, CDCl<sub>3</sub>)  $\delta = -69.6$  (s, CF<sub>3</sub>) ppm.

**Dimethyl (S,E)-2-(1,1,1-trifluoro-4-(3-methoxyphenyl)-4-((4-methylphenyl)sulfonamido)but-3-en-2-yl)malonate (3j)**

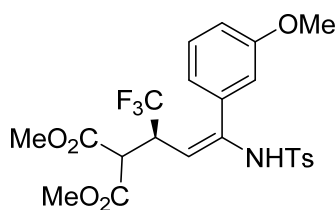

Chiral HPLC analysis: Lux Amylose-1, hexane-*i*PrOH 90:10, 1 mL/min, *E*-diastereomer: *major enantiomer* (*S*)  $t_r = 19.4$  min, *minor enantiomer* (*R*)  $t_r = 30.7$  min; *Z*-diastereomer: *major enantiomer*  $t_r = 26.5$  min, *minor enantiomer*  $t_r = 21.8$  min.

**Major E-diastereomer:** Yellow solid, m.p. 102-105 °C (hexane-EtOAc);  $[\alpha]_D^{20} -40.3$  ( $c$  0.95, CHCl<sub>3</sub>) for the mixture of diastereomers; <sup>1</sup>H NMR (300 MHz, CDCl<sub>3</sub>)  $\delta$  7.82 (2H, d,  $J = 8.4$  Hz, Ar), 7.38 (2H, d,  $J = 8.4$  Hz, Ar), 7.28-7.25 (1H, m, Ar), 6.93 (1H, ddd,  $J = 8.4, 2.4, 1.2$  Hz, Ar), 6.71-6.69 (2H, m, Ar), 6.31 (1H, s, NH), 5.65 (1H, d,  $J = 10.8$  Hz, =CH), 3.88 (1H, d,  $J = 8.7$  Hz, CHCO<sub>2</sub>Me), 3.80 (3H, s, MeO), 3.79 (3H, s, MeO), 3.76-3.75 (1H, m, CH-CF<sub>3</sub>), 3.70 (3H, s, MeO), 2.50 (3H, s, Me-Ar); <sup>13</sup>C NMR (75 MHz, CDCl<sub>3</sub>)  $\delta$  166.8 (C), 166.6 (C), 159.6 (C), 144.2 (C), 141.1 (C), 135.9 (C), 135.3 (C), 129.9 (CH), 129.6 (CH), 127.7 (CH), 125.4 (C, q,  $J_{C-F} = 257.3$  Hz), 120.6 (CH), 115.7 (CH), 113.6 (CH), 102.9 (CH, q,  $J_{C-F} = 2.0$  Hz), 55.2 (CH<sub>3</sub>), 52.95 (CH<sub>3</sub>), 52.94 (CH<sub>3</sub>), 51.0 (CH), 42.6 (CH, q,  $J_{C-F} = 27.9$  Hz), 21.5 (CH<sub>3</sub>); <sup>19</sup>F NMR (282 MHz, CDCl<sub>3</sub>)  $\delta = -70.2$  (s, CF<sub>3</sub>) ppm; HRMS (ESI)  $m/z$  516.1294 (M+H)<sup>+</sup>, C<sub>23</sub>H<sub>25</sub>F<sub>3</sub>NO<sub>7</sub>S requires 516.1298.

**Minor Z-diastereomer:** <sup>1</sup>H NMR (300 MHz, CDCl<sub>3</sub>), representative signals taken from the <sup>1</sup>H NMR of the diastereomer mixture,  $\delta$  7.99 (1H, s, NH), 7.65 (2H, d,  $J = 8.4$  Hz, Ar), 7.37-7.32 (1H, m, Ar), 7.06 (dt,  $J = 7.8, 1.2$  Hz, Ar), 6.75-6.65 (2H, m, Ar), 5.31 (1H, d,  $J = 11.4$  Hz, =CH), 3.89-3.67 (2H, m, CH-CF<sub>3</sub>, CHCO<sub>2</sub>Me), 3.86 (3H, s, MeO), 3.80 (3H, s, MeO), 3.75 (3H, s, MeO), 2.45 (3H, s, Me-Ar); <sup>19</sup>F NMR (282 MHz, CDCl<sub>3</sub>)  $\delta = -69.8$  (s, CF<sub>3</sub>) ppm.



**Dimethyl (S,E)-2-(1,1,1-trifluoro-4-(2-methoxyphenyl)-4-((4-methylphenyl)sulfonamido)but-3-en-2-yl)malonate (3k)**

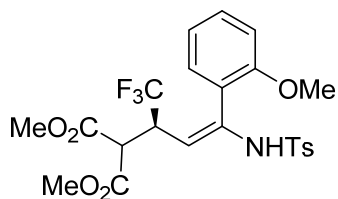

Chiral HPLC analysis: Chiralpak AD-H, hexane-*i*PrOH 90:10, 1 mL/min, *E*-diastereomer: *major enantiomer (S)* tr = 21.6 min, *minor enantiomer (R)* tr = 47.2 min; *Z*-diastereomer: *major enantiomer* tr = 38.3 min, *minor enantiomer* tr = 32.7 min.

**Major *E*-diastereomer:** Yellow solid, m.p. 129-133 °C (hexane-EtOAc);  $[\alpha]_D^{20}$  -32.2 (*c* 0.92, CHCl<sub>3</sub>) for the mixture of diastereomers; <sup>1</sup>H NMR(300 MHz, CDCl<sub>3</sub>) δ 7.72 (2H, d, *J* = 8.4 Hz, Ar), 7.28-7.25 (2H, m, Ar), 7.03-7.00 (2H, m, Ar), 6.89 (1H, dt, *J* = 7.5, 1.2 Hz, Ar), 6.82 (1H, dd, *J* = 8.4, 1.2 Hz, Ar), 6.18 (1H, s, NH), 5.69 (1H, d, *J* = 10.8 Hz, =CH), 3.75 (3H, s, MeO), 3.69-3.55 (2H, m, CH-CF<sub>3</sub>, CHCO<sub>2</sub>Me), 3.65 (3H, s, MeO), 3.60 (3H, s, MeO), 2.42 (3H, s, Me-Ar); <sup>13</sup>C NMR (75 MHz, CDCl<sub>3</sub>) δ 166.8 (C), 166.6 (C), 156.7 (C), 143.8 (C), 138.8 (C), 136.1 (C), 131.2 (C), 131.0 (C), 129.3 (CH), 128.9 (CH), 127.9 (CH), 127.1 (CH), 125.0 (C, q, *J*<sub>C-F</sub> = 258.8 Hz), 120.6 (CH), 111.0 (CH), 113.6 (CH), 105.6 (CH, q, *J*<sub>C-F</sub> = 2.0 Hz), 55.1 (CH<sub>3</sub>), 52.9 (CH<sub>3</sub>), 51.1 (CH), 42.8 (CH, q, *J*<sub>C-F</sub> = 27.8 Hz), 21.5 (CH<sub>3</sub>); <sup>19</sup>F NMR (282 MHz, CDCl<sub>3</sub>) δ = -70.2 (s, CF<sub>3</sub>) ppm; HRMS (ESI) *m/z* 516.1302 (M+H)<sup>+</sup>, C<sub>23</sub>H<sub>25</sub>F<sub>3</sub>NO<sub>7</sub>S requires 516.1298.

**Minor *Z*-diastereomer:** <sup>1</sup>H NMR (300 MHz, CDCl<sub>3</sub>), representative signals taken from the <sup>1</sup>H NMR of the diastereomer mixture, δ 7.81 (2H, d, *J* = 8.1 Hz, Ar), 7.38-6.49 (7H, m, Ar, NH), 5.44 (1H, d, *J* = 10.8 Hz, =CH), 3.82-3.60 (2H, m, CH-CF<sub>3</sub>, CHCO<sub>2</sub>Me), 3.83 (3H, s, MeO), 3.73 (3H, s, MeO), 3.55 (3H, s, MeO), 2.31 (3H, s, Me-Ar); <sup>19</sup>F NMR (282 MHz, CDCl<sub>3</sub>) δ = -69.5 (s, CF<sub>3</sub>) ppm.

**Dimethyl (S,E)-2-(1,1,1-trifluoro-4-((4-methylphenyl)sulfonamido)-4-(naphthalen-2-yl)but-3-en-2-yl)malonate (3l)**

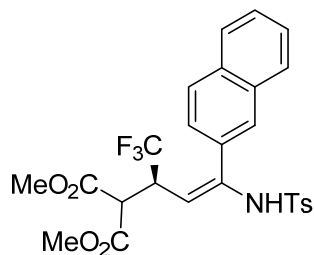

Chiral HPLC analysis: Lux Amylose-1, hexane-*i*PrOH 80:20, 1 mL/min, *E*-diastereomer: *major enantiomer (S)* tr = 11.3 min, *minor enantiomer (R)* tr = 13.8 min; *Z*-diastereomer: *major enantiomer* tr = 12.3 min, *minor enantiomer* tr = 9.4 min

**Major *E*-diastereomer:** Yellow solid, m.p. 98-103 °C (hexane-EtOAc);  $[\alpha]_D^{20}$  1.0 (*c* 0.96, CHCl<sub>3</sub>) for the mixture of diastereomers; <sup>1</sup>H NMR (300 MHz, CDCl<sub>3</sub>) δ 7.80-7.74 (5H, m, Ar), 7.59-7.58 (1H, m, Ar), 7.53-7.49 (2H, m, Ar), 7.30 (2H, d, *J* = 8.1 Hz Ar), 7.14 (1H, dd, *J* = 8.1, 1.8 Hz, Ar), 6.38 (1H, s, NH), 5.65 (1H, d, *J* = 10.8 Hz, =CH), 3.82-3.69 (2H, m, CH-CF<sub>3</sub>, CHCO<sub>2</sub>Me), 3.76 (3H, s, MeO), 3.60 (3H, s, MeO), 2.44 (3H, s, Me-Ar); <sup>13</sup>C NMR (75 MHz, CDCl<sub>3</sub>) δ 166.7 (C), 166.5 (C), 144.2 (C), 141.4 (C), 136.0 (C), 133.3 (C), 132.8 (C), 131.2 (C), 129.6 (CH), 128.64 (CH), 128.57 (CH), 128.3 (CH), 127.7 (CH), 127.1 (CH), 126.6 (CH), 125.5 (CH), 125.4 (C, q, *J*<sub>C-F</sub> = 264.8 Hz), 123.7 (CH), 104.0 (CH, q, *J*<sub>C-F</sub> = 2.0 Hz), 53.0 (CH<sub>3</sub>), 52.9 (CH<sub>3</sub>), 51.1 (CH), 42.7

(CH, q,  $J_{C-F} = 28.5$  Hz), 21.5 (CH<sub>3</sub>); <sup>19</sup>F NMR (282 MHz, CDCl<sub>3</sub>)  $\delta = -70.0$  (s, CF<sub>3</sub>) ppm; HRMS (ESI)  $m/z$  536.1346 (M+H)<sup>+</sup>, C<sub>26</sub>H<sub>25</sub>F<sub>3</sub>NO<sub>6</sub>S requires 536.1349.

**Minor Z-diastereomer:** <sup>1</sup>H NMR (300 MHz, CDCl<sub>3</sub>), representative signals taken from the <sup>1</sup>H NMR of the diastereomer mixture,  $\delta$  8.05 (1H, s, NH), 7.87-6.94 (11H, m, Ar), 5.37 (1H, d,  $J = 11.1$  Hz, =CH), 3.82 (3H, s, MeO), 3.80-3.60 (2H, m, CH-CF<sub>3</sub>, CHCO<sub>2</sub>Me), 3.68 (3H, s, MeO), 2.34 (3H, s, Me-Ar); <sup>19</sup>F NMR (282 MHz, CDCl<sub>3</sub>)  $\delta = -69.6$  (s, CF<sub>3</sub>) ppm.

## Synthetic transformations of compound 3a

### Dimethyl 2-((2*S*,4*R*)-1,1,1-trifluoro-4-((4-methylphenyl)sulfonamido)-4-phenylbutan-2-yl)malonate (**4a**)

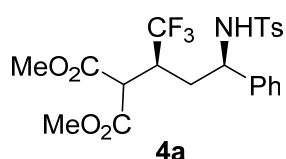

To a sample of compound (*S,E*)-**3a** (52.0 mg, 0.11 mmol, *E/Z* 96:4, ee = 89%/69%), dissolved in dry CH<sub>2</sub>Cl<sub>2</sub> (3.3 mL) under nitrogen atmosphere was added triethylsilane (50 μL, 0.428 mmol) followed by BF<sub>3</sub>·Et<sub>2</sub>O (67 μL, 0.471 mmol). After stirring for 48 h at room temperature, the mixture was chromatographed on silica gel eluting with hexane:EtOAc (80:20) to give 48.1 mg (92%) of compound **4a**, as a c.a. 88:12 of two diastereomers. Chiral HPLC analysis: Lux Amylose-1, hexane-*i*PrOH 90:10, 1 mL/min, (**2*S*,4*R***) major diastereomer (ee = 87%), major enantiomer tr = 16.4 min, minor enantiomer tr = 15.0 min; (**2*S*,4*S***) minor diastereomer unresolved tr = 8.3 min. Chiralpak IC, hexane-*i*PrOH 95:05, 2 mL/min, (**2*S*,4*R***) major diastereomer, tr > 120 min; (**2*S*,4*S***) minor diastereomer (ee = 89%) major enantiomer tr = 37.6 min, minor enantiomer tr = 35.8 min;

(**2*S*,4*R***)-**4a** (major): colorless oil; [α]<sub>D</sub><sup>20</sup> 7.8 (*c* 0.97, CHCl<sub>3</sub>) for the diastereomer mixture; <sup>1</sup>H NMR (300 MHz, CDCl<sub>3</sub>) δ 7.52 (2H, d, *J* = 8.1 Hz, Ar), 7.20-7.13 (3H, m, Ar), 7.10 (2H, d, *J* = 8.1 Hz, Ar), 7.02-7.6.90 (2H, m, Ar), 5.13 (1H, d, *J* = 8.1 Hz, NH), 4.47 (1H, q, *J* = 7.8 Hz, CHPh), 3.73 (3H, s, MeO), 3.69 (1H, d, *J* = 5.4 Hz, CHCO<sub>2</sub>Me), 2.83 (1H, m, CHCF<sub>3</sub>), 2.34 (3H, s, Me-Ar), 2.32-2.10 (2H, m, CH<sub>2</sub>); <sup>13</sup>C NMR (75 MHz, CDCl<sub>3</sub>) δ 167.1 (C), 167.0 (C), 143.1 (C), 138.8 (C), 137.2 (C), 129.3 (CH), 128.6 (CH), 128.5 (C), 127.9 (CH), 127.0 (CH), 126.8 (CH), 126.6 (C, q, *J*<sub>C-F</sub> = 278 Hz), 56.4 (CH), 53.1 (CH<sub>3</sub>), 52.8 (CH<sub>3</sub>), 49.9 (CH), 40.0 (CH, q, *J*<sub>C-F</sub> = 26.8 Hz), 33.4 (CH<sub>2</sub>), 21.4 (CH<sub>3</sub>); <sup>19</sup>F NMR (282 MHz, CDCl<sub>3</sub>) δ = -68.5 (s, CF<sub>3</sub>) ppm; HRMS (ESI) *m/z* 488.1357 (M+H)<sup>+</sup>, C<sub>22</sub>H<sub>25</sub>F<sub>3</sub>NO<sub>6</sub>S requires 488.1349.

(**2*S*,4*S***)-**4a** (minor): <sup>1</sup>H NMR (300 MHz, CDCl<sub>3</sub>), representative signals taken from the diastereomer mixture δ 7.58 (2H, d, *J* = 8.4 Hz, Ar), 7.40-6.90 (7H, m, Ar), 5.95 (1H, d, *J* = 6.9 Hz, NH), 4.45 (1H, m, CHPh), 3.81 (3H, s, MeO), 3.72 (3H, s, MeO), 2.83 (1H, m, CHCF<sub>3</sub>), 2.34 (3H, s, Me-Ar), 2.32-2.10 (2H, m, CH<sub>2</sub>); <sup>19</sup>F NMR (282 MHz, CDCl<sub>3</sub>) δ = -70.1 (s, CF<sub>3</sub>) ppm.

### Methyl (3*R*,4*S*,6*R*)-2-oxo-6-phenyl-1-tosyl-4-(trifluoromethyl)piperidine-3-carboxylate.

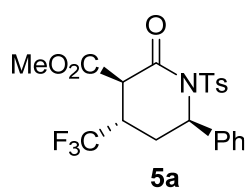

A 25% solution of tetraethylammonium hydroxide in MeOH (24 μL, 0.14 mmol) was added to a solution of compound **4a** (28.0 mg, 0.037 mmol, ee = 87%) in dimethylsulfoxide (1.6 mL) under nitrogen, and the reaction flask was introduced in a bath at 80 °C. After 14 h, the reaction mixture was diluted with EtOAc (75 mL), washed with water (5 × 5 mL), brine (5 mL), and dried over MgSO<sub>4</sub>. Purification by column chromatography eluting with hexane:EtOAc (80:20) gave 13.2 mg (78%) of compound **5a**. Chiral HPLC analysis: Lux Amylose-1, hexane-*i*PrOH 90:10, 1 mL/min,

major enantiomer *tr* = 24.0 min, minor enantiomer *tr* = 22.1 min. White solid, m.p. 177-179 °C (hexane-EtOAc);  $[\alpha]_D^{20}$  -4.5 (*c* 1.0, CHCl<sub>3</sub>, ee = 87%); <sup>1</sup>H NMR (300 MHz, CDCl<sub>3</sub>) δ 7.56 (2H, d, *J* = 8.5 Hz, Ar), 7.40-7.32 (3H, m, Ar), 7.20-7.14 (4H, m, Ar), 5.93 (1H, t, *J* = 3.8 Hz, CH-Ph), 3.78 (3H, s, OMe), 3.65 (1H, d, *J* = 11.4 Hz, CHCO<sub>2</sub>Me), 3.11 (1H, m, CHCF<sub>3</sub>), 2.40 (3H, s, Me-Ar), 2.35-2.28 (2H, m, CH<sub>2</sub>); <sup>13</sup>C NMR (75 MHz, CDCl<sub>3</sub>) δ 168.3 (C), 164.3 (C), 145.4 (C), 138.1 (C), 134.5 (C), 129.7 (CH), 129.0 (CH), 128.5 (C), 126.5 (CH), 125.6 (C, q, *J*<sub>C-F</sub> = 278 Hz), 58.3 (CH), 53.4 (CH<sub>3</sub>), 52.8 (CH<sub>3</sub>), 50.2 (CH), 37.1 (CH, q, *J*<sub>C-F</sub> = 28.5 Hz), 29.9 (CH<sub>2</sub>), 21.7 (CH<sub>3</sub>); <sup>19</sup>F NMR (282 MHz, CDCl<sub>3</sub>) δ = -73.1 (s, CF<sub>3</sub>) ppm; HRMS (ESI) *m/z* 456.1087 (M+H)<sup>+</sup>, C<sub>21</sub>H<sub>21</sub>F<sub>3</sub>NO<sub>5</sub>S requires 456.1077.

### Determination of the relative stereochemistry of compounds 4a and 5a

The relative stereochemistry of compound **5a**, and hence, of its precursor, the major diastereomer of compound **4a**, was established considering the coupling constants of the ring-attached protons (see figure):

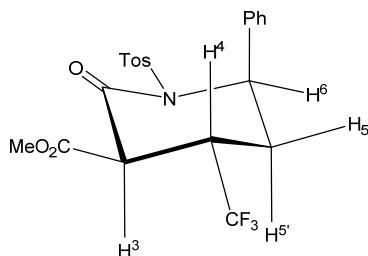

|    |              |                                                                           |
|----|--------------|---------------------------------------------------------------------------|
| H6 | 5.93 ppm (t) | $J_{6,5} = 3.8$ Hz (eq- <i>eq</i> ), $J_{6,5'} = 3.8$ Hz (eq- <i>ax</i> ) |
| H3 | 3.65 ppm (d) | $J_{3,4} = 11.4$ Hz ( <i>ax-ax</i> ),                                     |

**Figure S1.** Coupling constants in compound **5a**

1 D. G. Stark, L. C. Morrill, P.-P. Yeh, A. M.Z. Slawin, T. J. C. O'Riordan, A. D. Smith, *Angew. Chem.Int. Ed.* **2013**, 52, 11642.

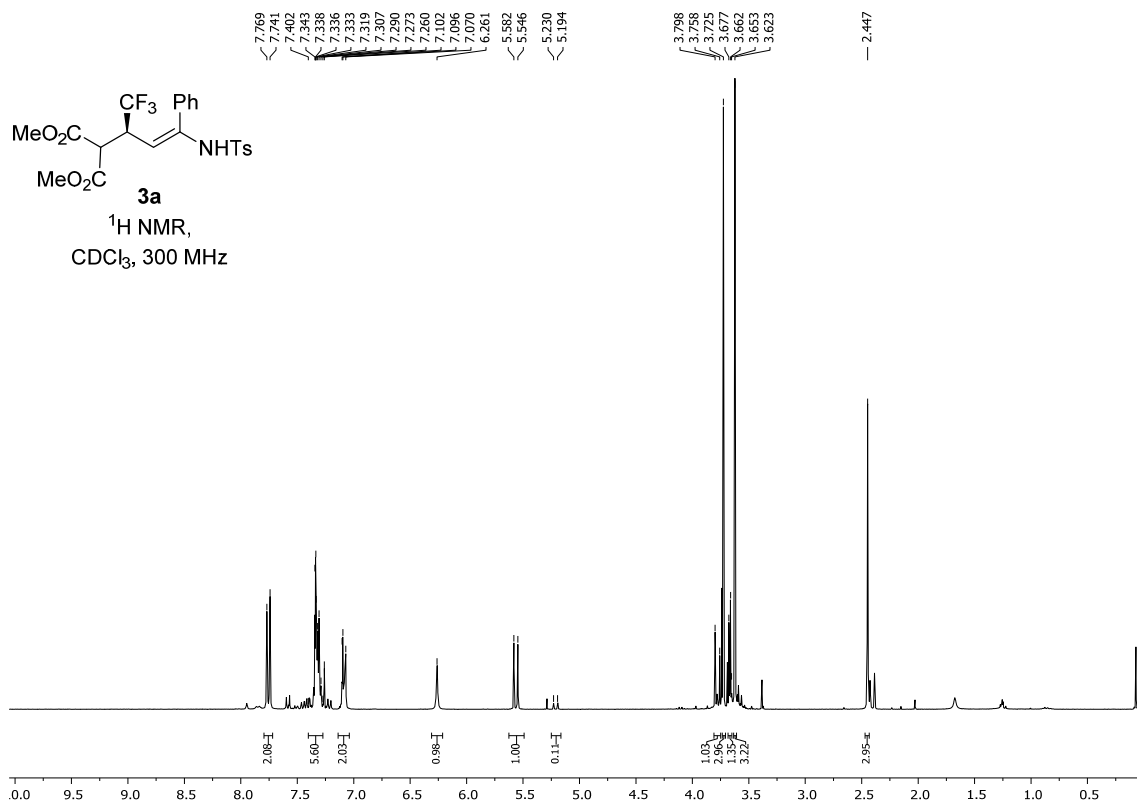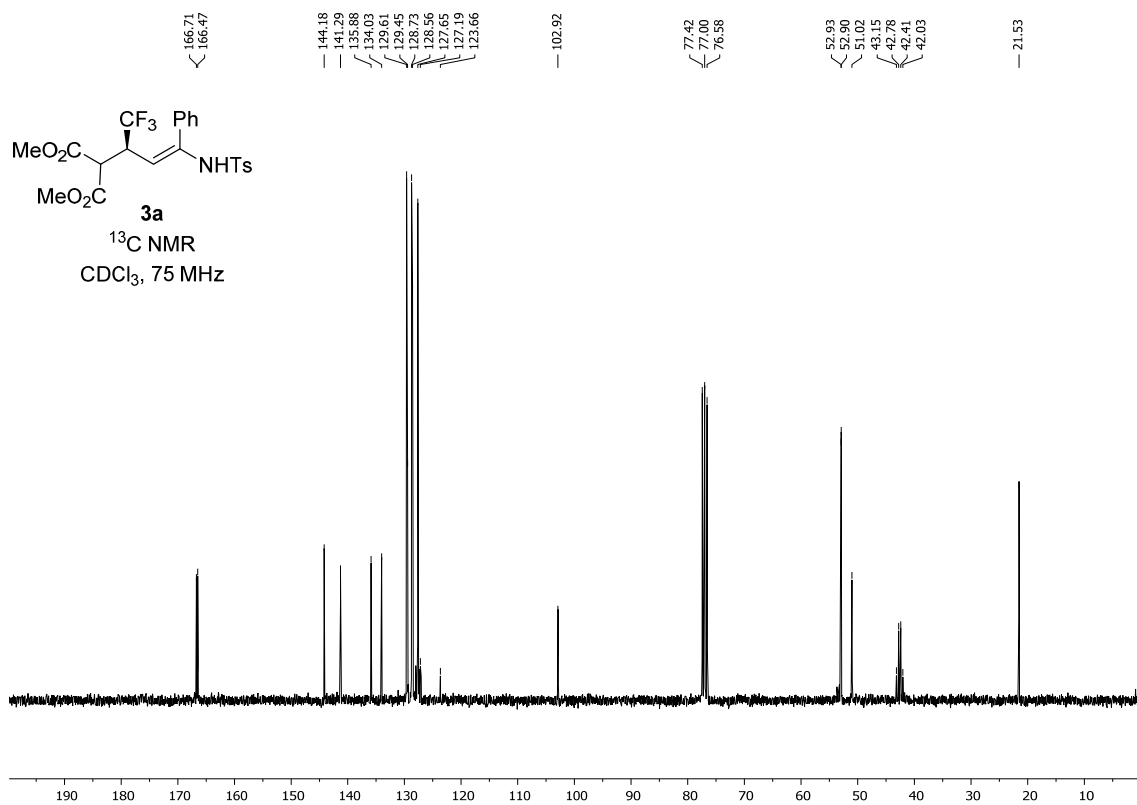

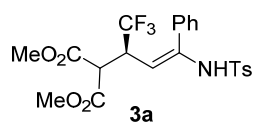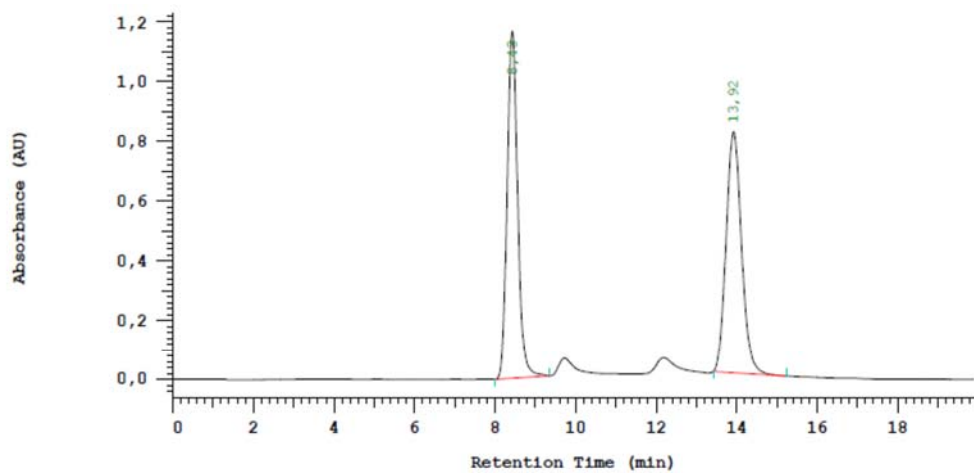

| No. | RT    | Area     | Area %  | Name |
|-----|-------|----------|---------|------|
| 1   | 8,43  | 10584244 | 49,555  |      |
| 2   | 13,92 | 10774280 | 50,445  |      |
|     |       | 21358524 | 100,000 |      |

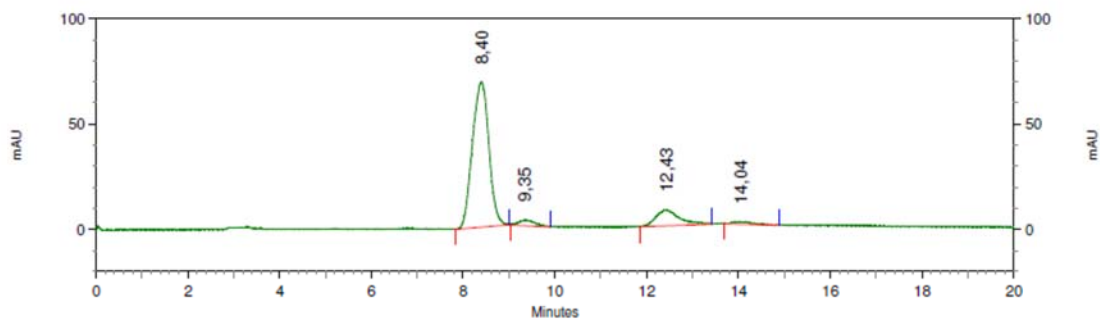

6: 280 nm, 4 nm Results

| Retention Time | Area    | Area Percent |
|----------------|---------|--------------|
| 8,40           | 6869947 | 81,639       |
| 9,35           | 281947  | 3,351        |
| 12,43          | 1096977 | 13,036       |
| 14,04          | 166126  | 1,974        |

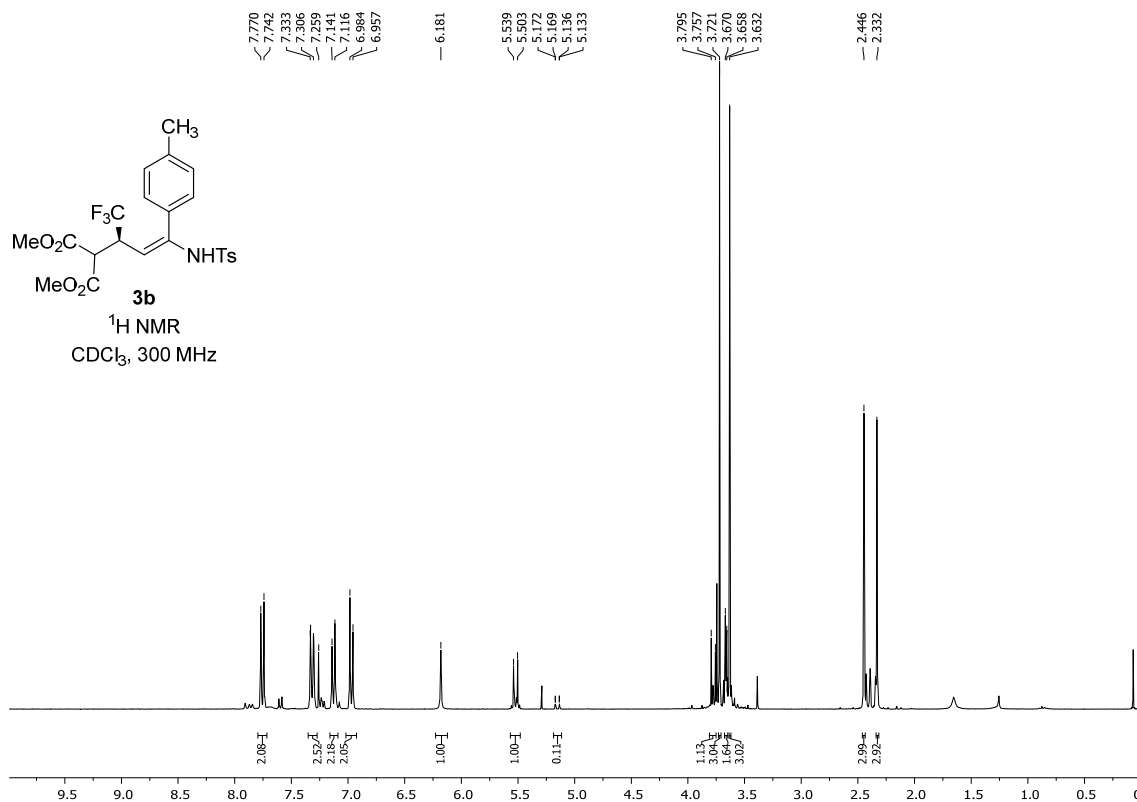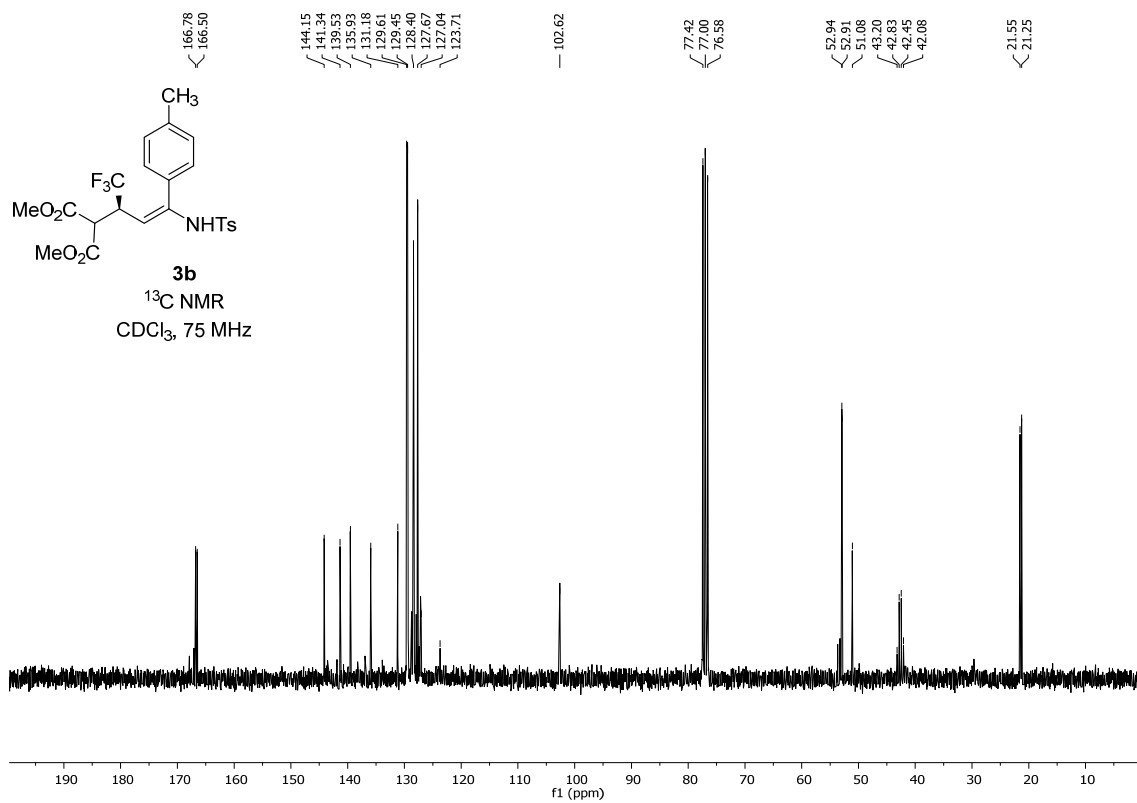

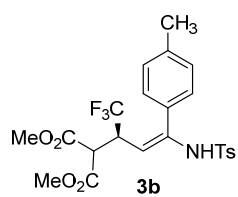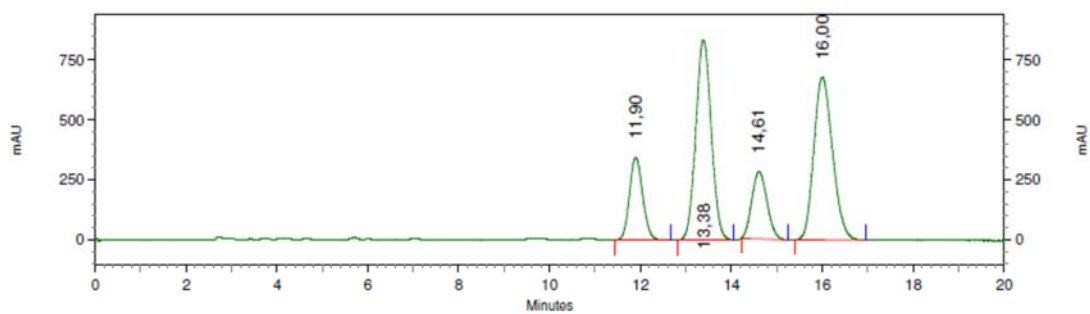

3: 240 nm, 4 nm Results

| Retention Time | Area     | Area Percent |
|----------------|----------|--------------|
| 11,90          | 28064804 | 13,267       |
| 13,38          | 79174978 | 37,428       |
| 14,61          | 26352385 | 12,458       |
| 16,00          | 77944696 | 36,847       |

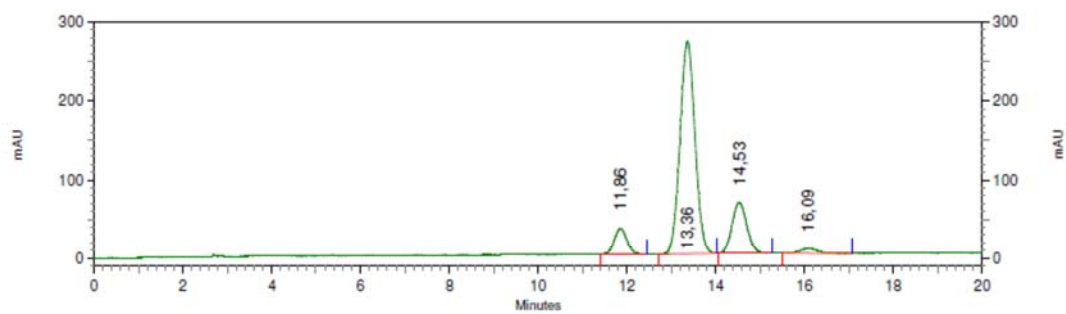

7: 270 nm, 4 nm Results

| Retention Time | Area     | Area Percent |
|----------------|----------|--------------|
| 11,86          | 2621585  | 7,556        |
| 13,36          | 25321055 | 72,982       |
| 14,53          | 6091668  | 17,558       |
| 16,09          | 660655   | 1,904        |



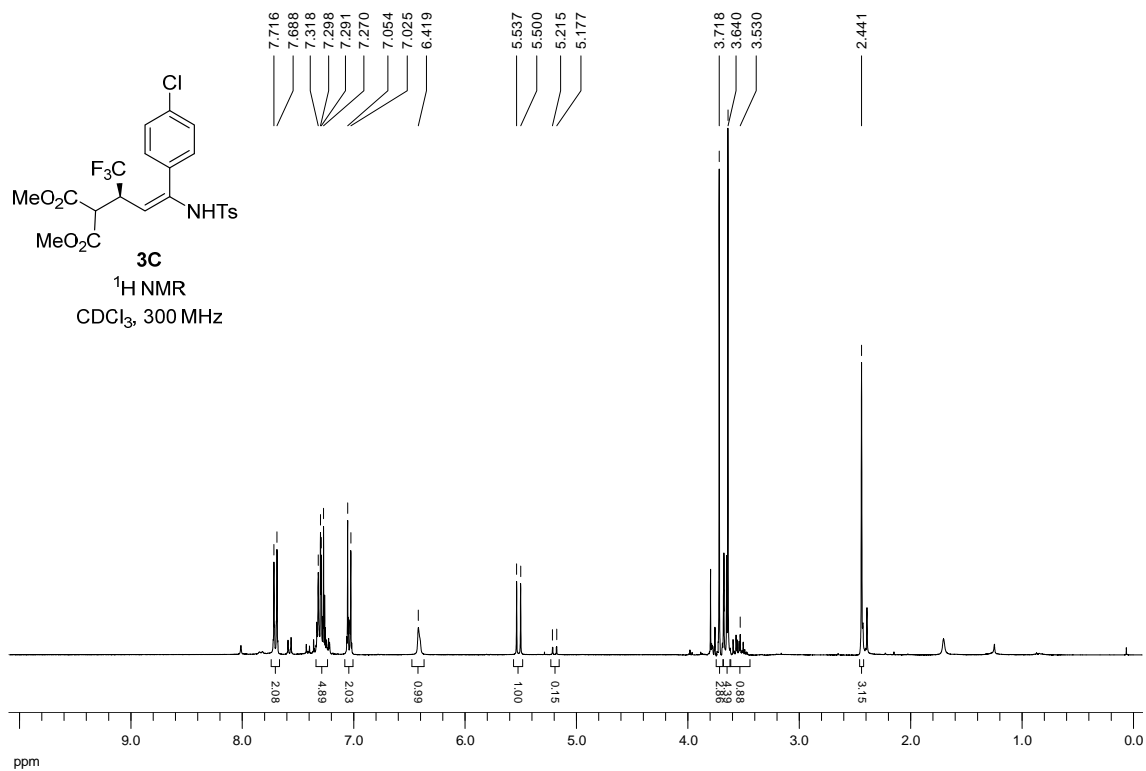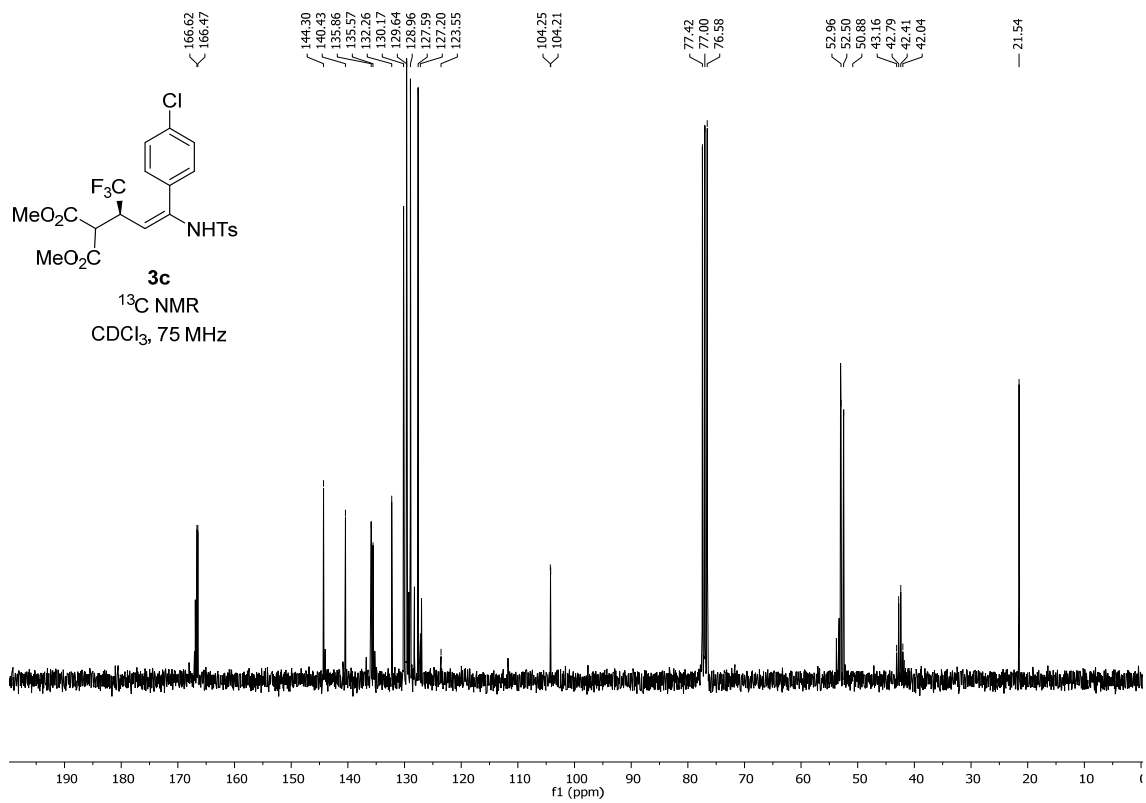

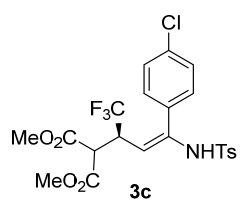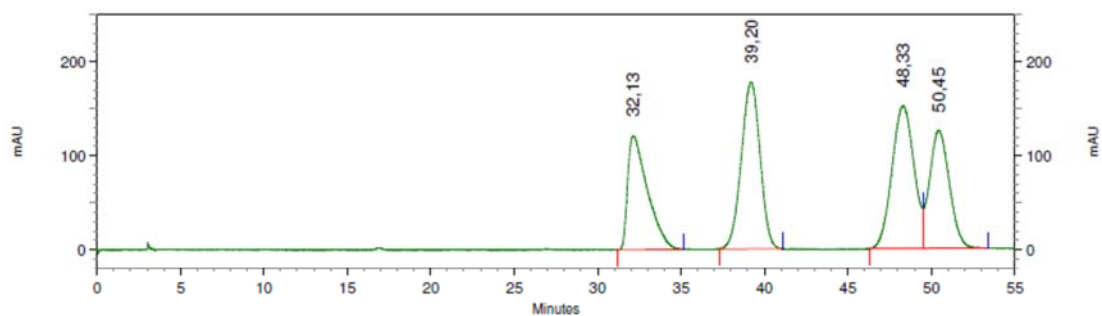

13: 250 nm, 4 nm  
Results

| Retention Time | Area     | Area Percent |
|----------------|----------|--------------|
| 32,13          | 40066660 | 20,800       |
| 39,20          | 55590059 | 28,859       |
| 48,33          | 55632362 | 28,881       |
| 50,45          | 41336988 | 21,460       |

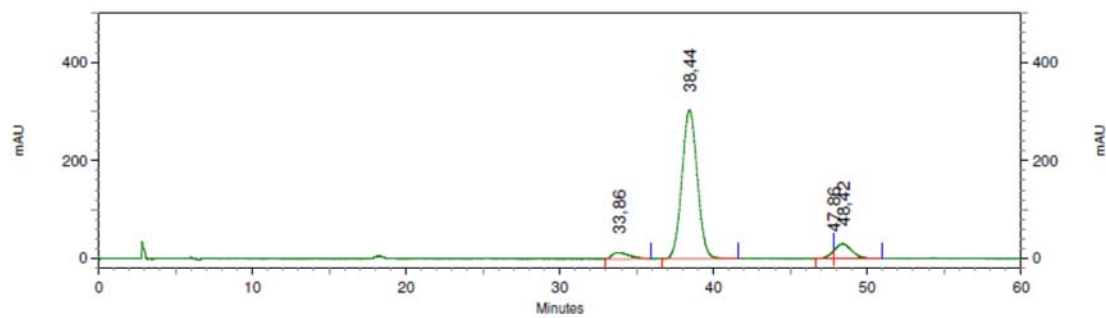

12: 220 nm, 4 nm  
Results

| Retention Time | Area     | Area Percent |
|----------------|----------|--------------|
| 33,86          | 4277468  | 4,322        |
| 38,44          | 84913788 | 85,800       |
| 47,86          | 1448248  | 1,463        |
| 48,42          | 8327505  | 8,414        |

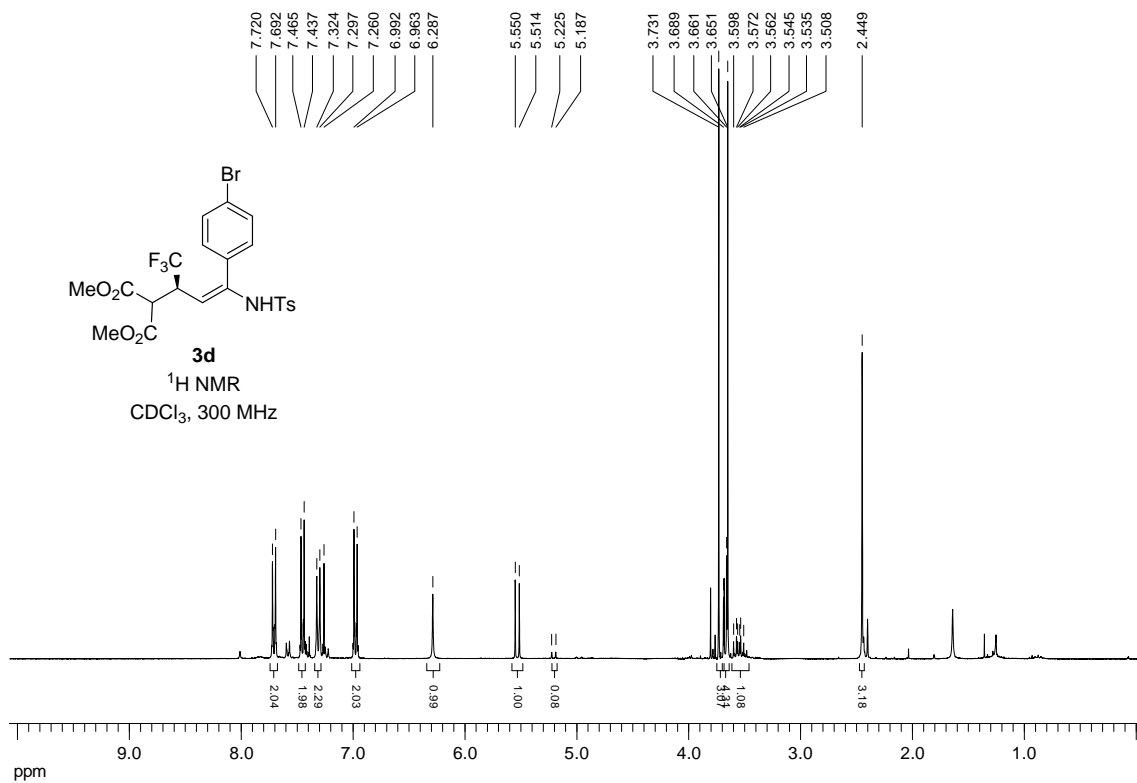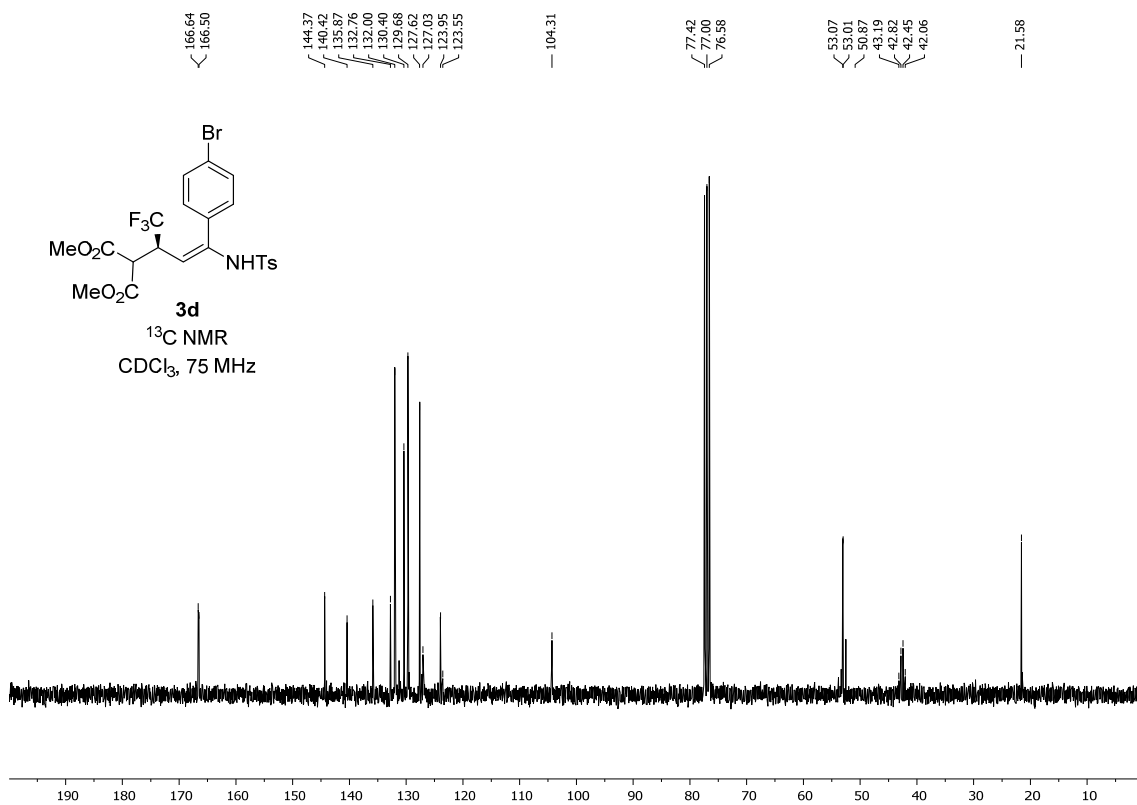

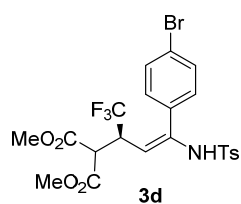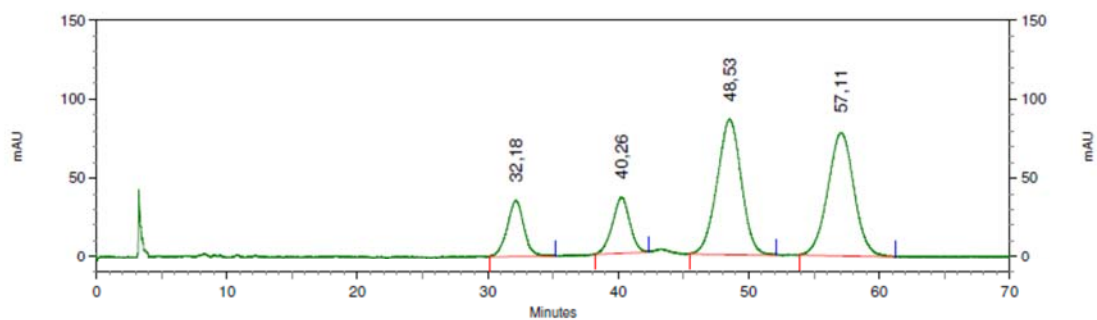

3: 220 nm, 4 nm Results

| Retention Time | Area     | Area Percent |
|----------------|----------|--------------|
| 32,18          | 12831961 | 11,192       |
| 40,26          | 13210649 | 11,523       |
| 48,53          | 44536148 | 38,845       |
| 57,11          | 44070703 | 38,440       |

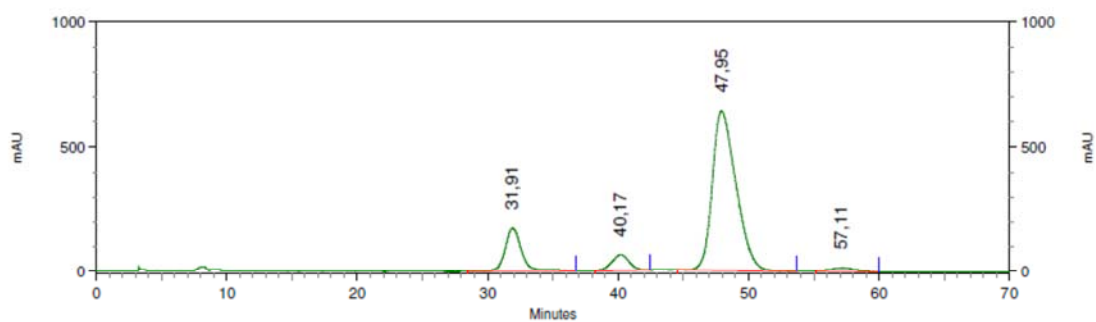

2: 240 nm, 4 nm Results

| Retention Time | Area      | Area Percent |
|----------------|-----------|--------------|
| 31,91          | 61799367  | 14,738       |
| 40,17          | 24333799  | 5,803        |
| 47,95          | 325343204 | 77,586       |
| 57,11          | 7855823   | 1,873        |

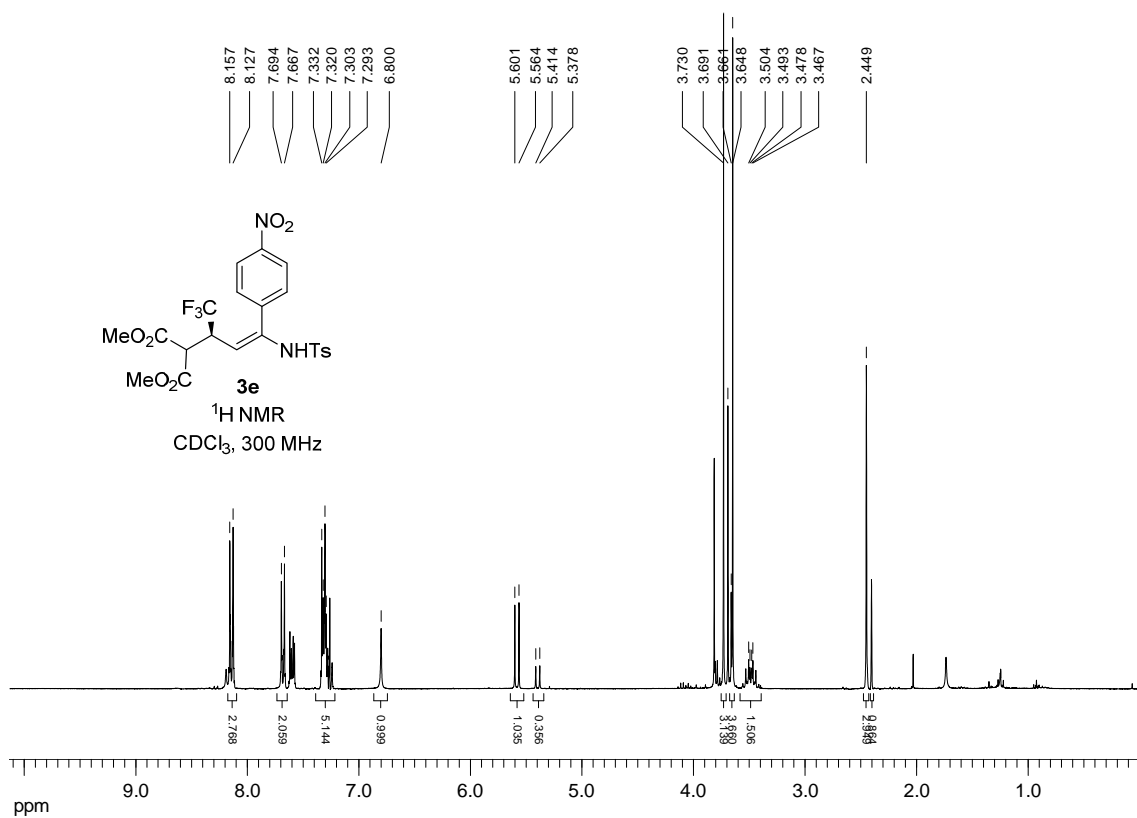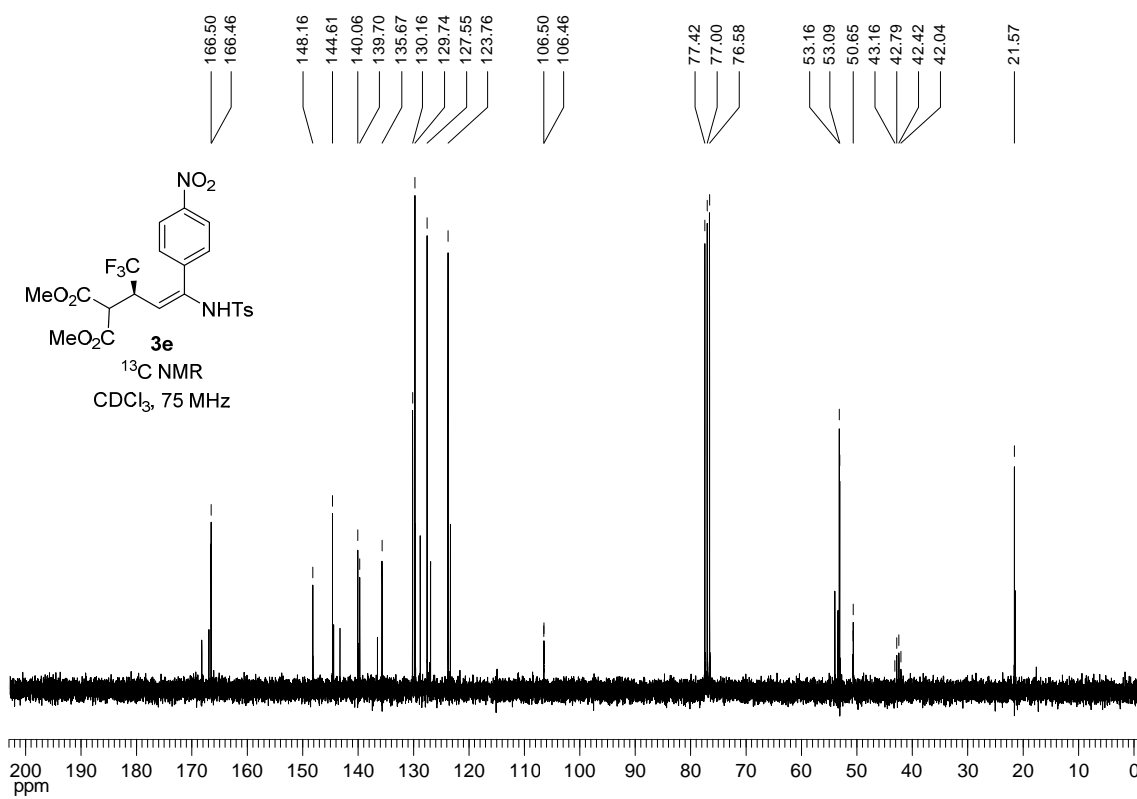

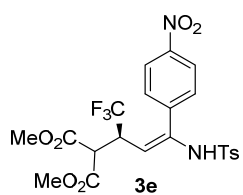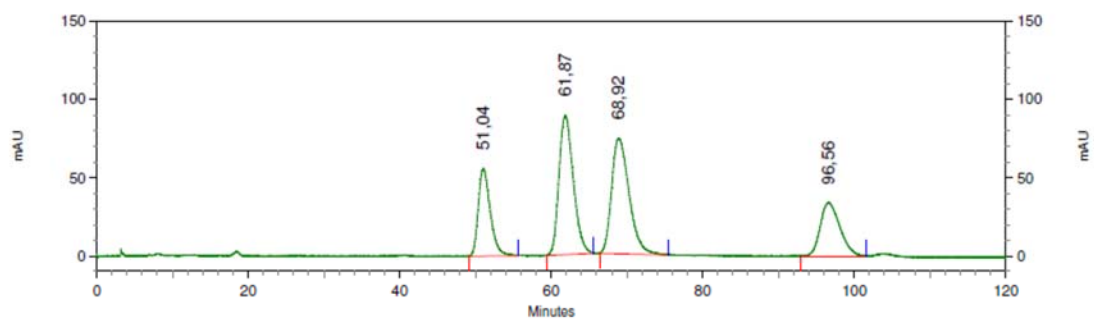

2: 250 nm, 4 nm Results

| Retention Time | Area     | Area Percent |
|----------------|----------|--------------|
| 51,04          | 24653841 | 17,171       |
| 61,87          | 46674020 | 32,507       |
| 68,92          | 47423624 | 33,029       |
| 96,56          | 24830845 | 17,294       |

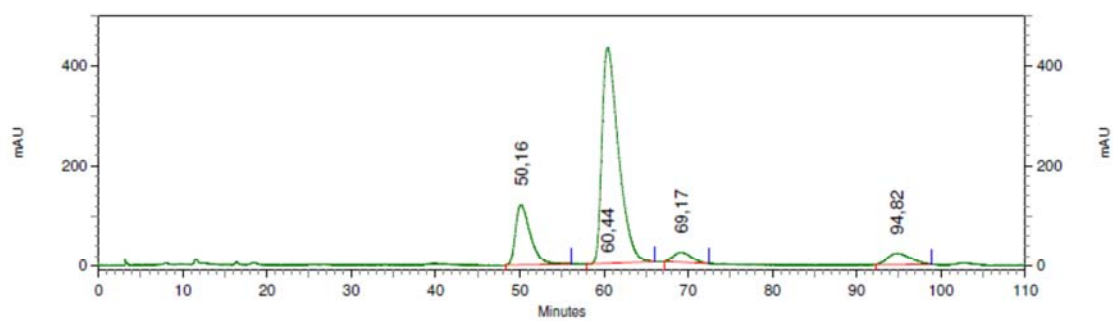

2: 250 nm, 4 nm Results

| Retention Time | Area      | Area Percent |
|----------------|-----------|--------------|
| 50,16          | 60239223  | 18,377       |
| 60,44          | 237092235 | 72,329       |
| 69,17          | 12432840  | 3,793        |
| 94,82          | 18034406  | 5,502        |

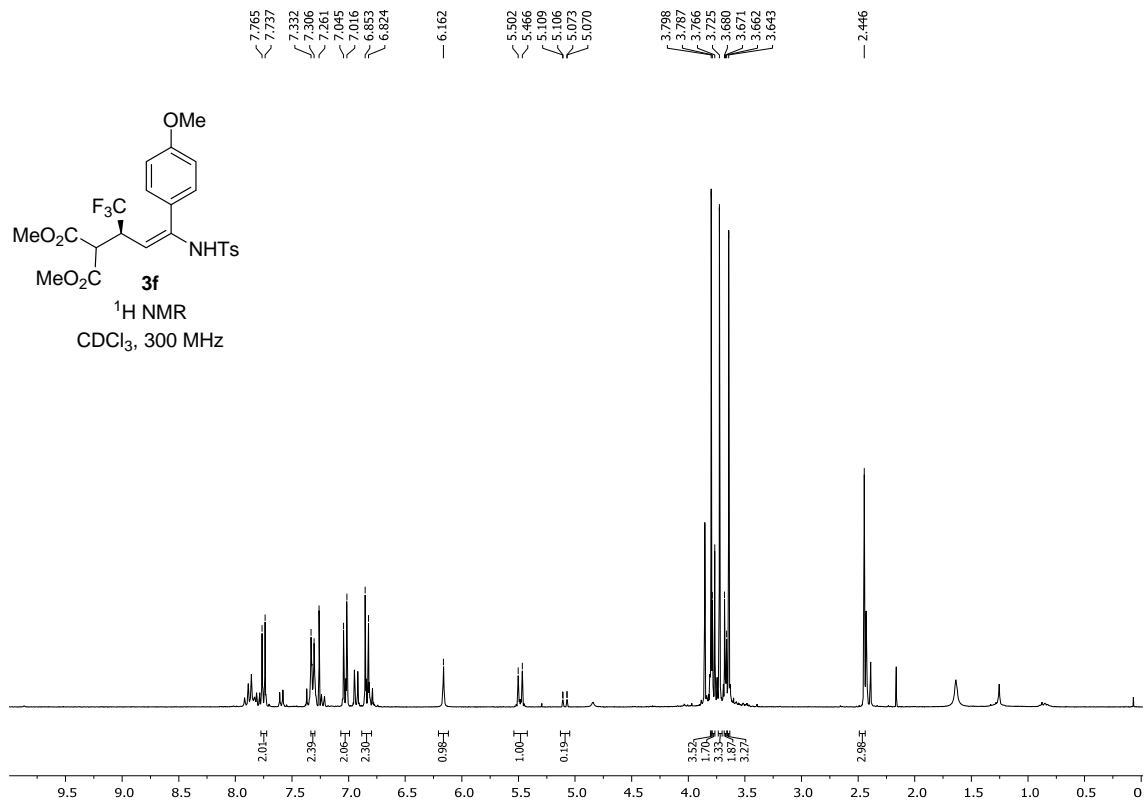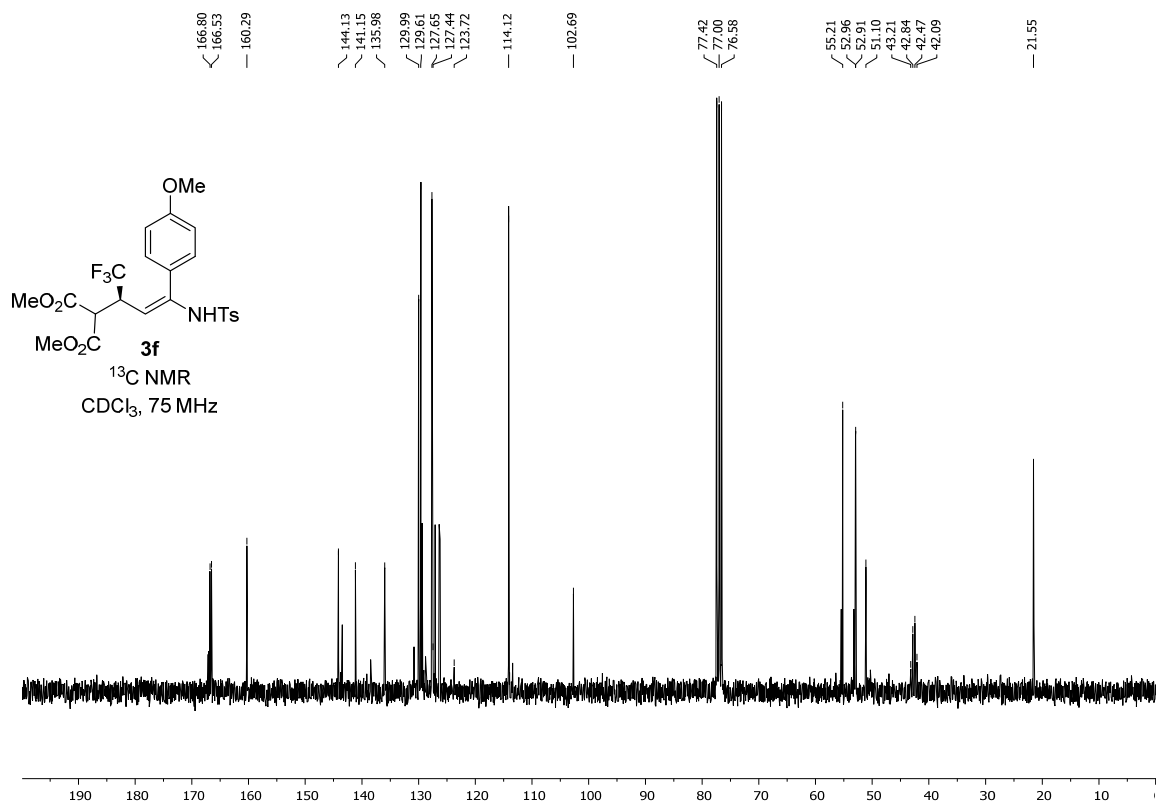

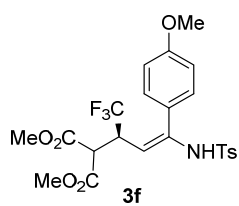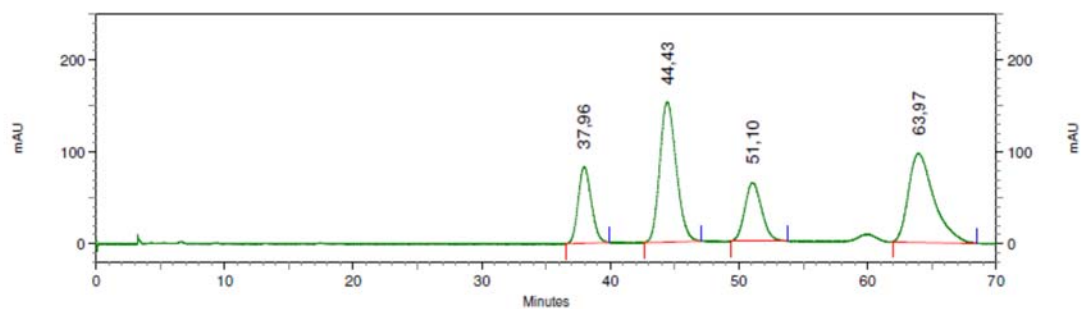

13: 250 nm, 4 nm

Results

| Retention Time | Area     | Area Percent |
|----------------|----------|--------------|
| 37,96          | 23906621 | 15,390       |
| 44,43          | 54493135 | 35,081       |
| 51,10          | 23247941 | 14,966       |
| 63,97          | 53687149 | 34,562       |

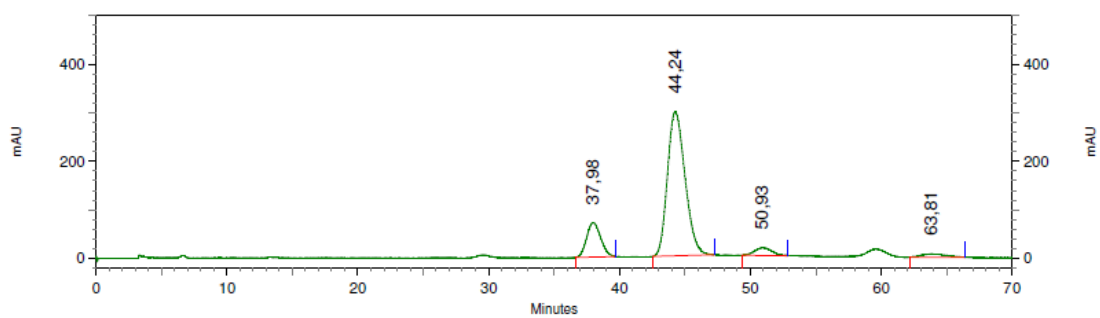

13: 250 nm, 4 nm

Results

| Retention Time | Area      | Area Percent |
|----------------|-----------|--------------|
| 37,98          | 21218148  | 14,931       |
| 44,24          | 111411062 | 78,400       |
| 50,93          | 5991092   | 4,216        |
| 63,81          | 3486368   | 2,453        |



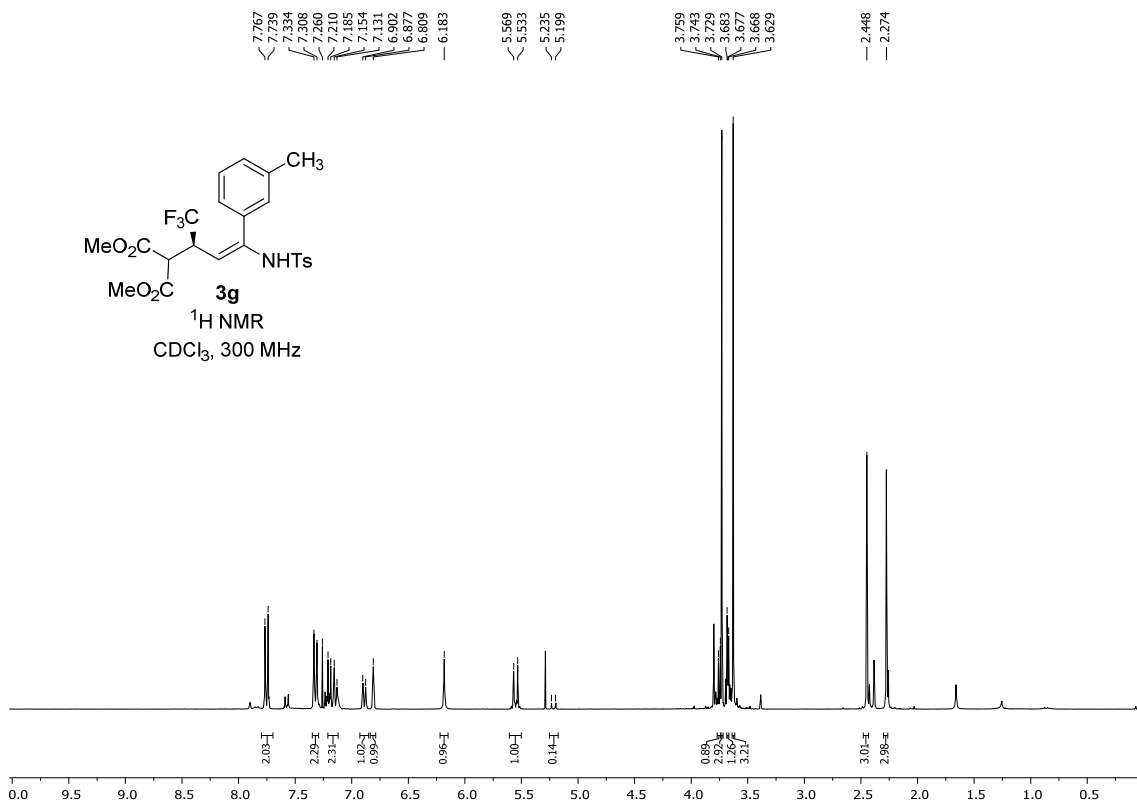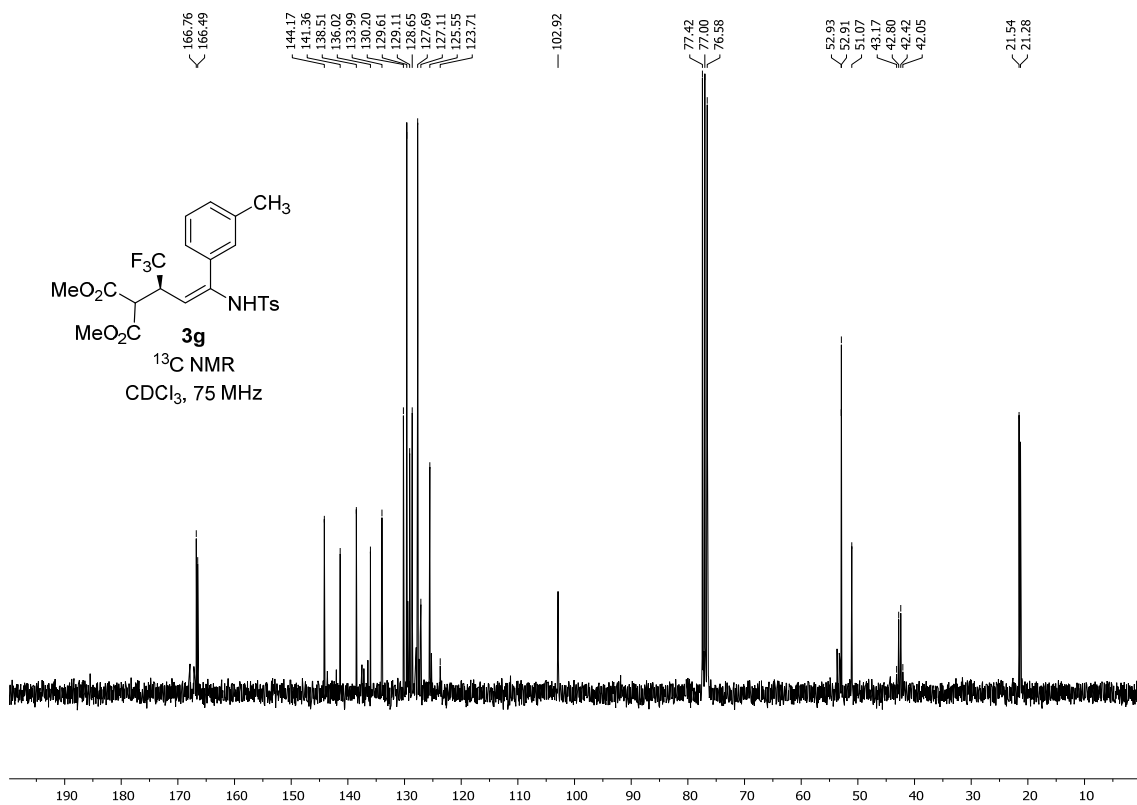

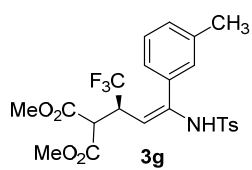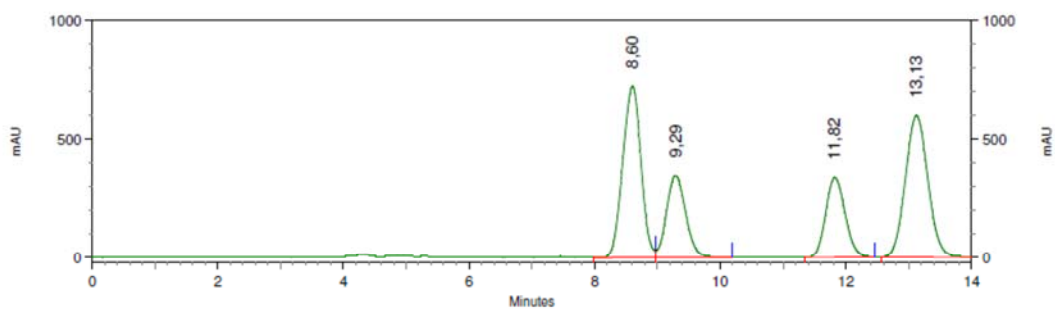

5: 250 nm, 4 nm Results

| Retention Time | Area     | Area Percent |
|----------------|----------|--------------|
| 8,60           | 58401268 | 32,954       |
| 9,29           | 29577670 | 16,690       |
| 11,82          | 29173969 | 16,462       |
| 13,13          | 60066740 | 33,894       |

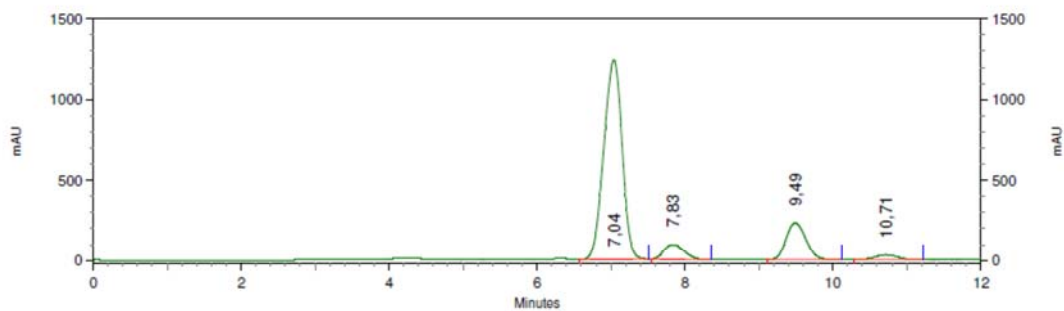

7: 260 nm, 4 nm Results

| Retention Time | Area     | Area Percent |
|----------------|----------|--------------|
| 7,04           | 85744726 | 75,785       |
| 7,83           | 7274374  | 6,429        |
| 9,49           | 17477257 | 15,447       |
| 10,71          | 2646307  | 2,339        |

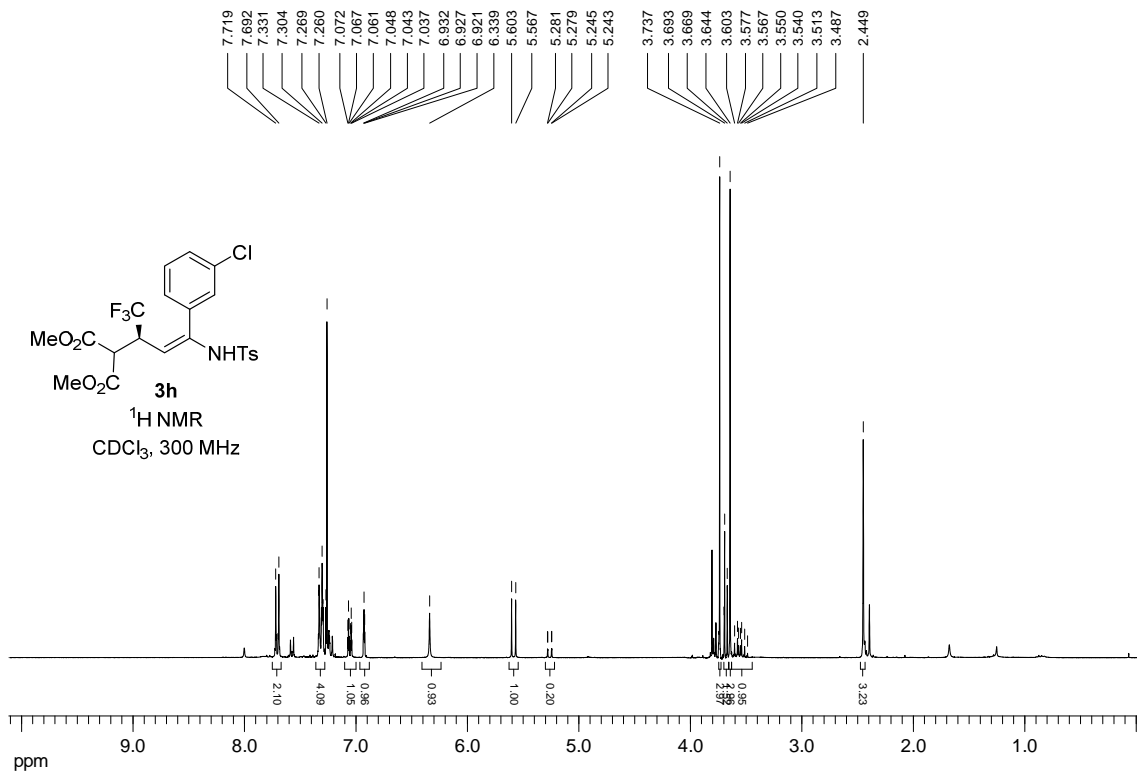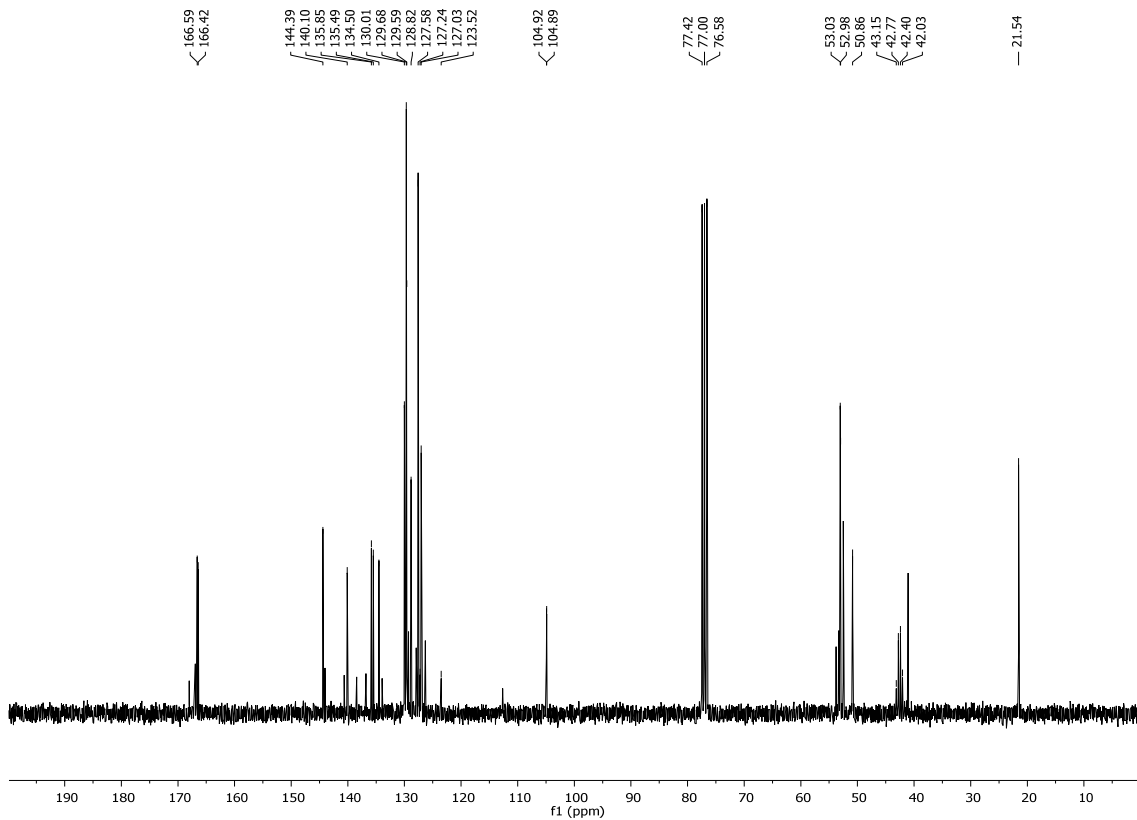

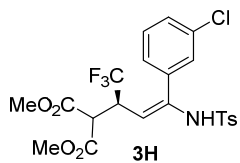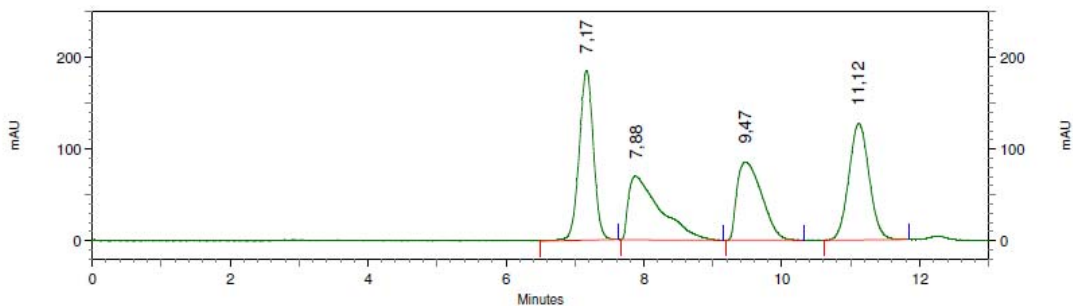

8: 270 nm, 4 nm Results

| Retention Time | Area     | Area Percent |
|----------------|----------|--------------|
| 7,17           | 10579681 | 27,533       |
| 7,88           | 8899930  | 23,162       |
| 9,47           | 8513973  | 22,157       |
| 11,12          | 10431744 | 27,148       |

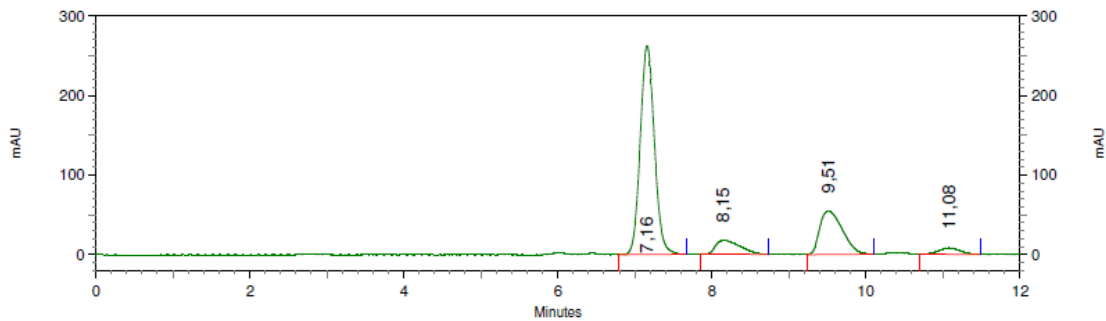

8: 270 nm, 4 nm Results

| Retention Time | Area     | Area Percent |
|----------------|----------|--------------|
| 7,16           | 13408638 | 66,894       |
| 8,15           | 1539248  | 7,679        |
| 9,51           | 4467929  | 22,290       |
| 11,08          | 628647   | 3,136        |

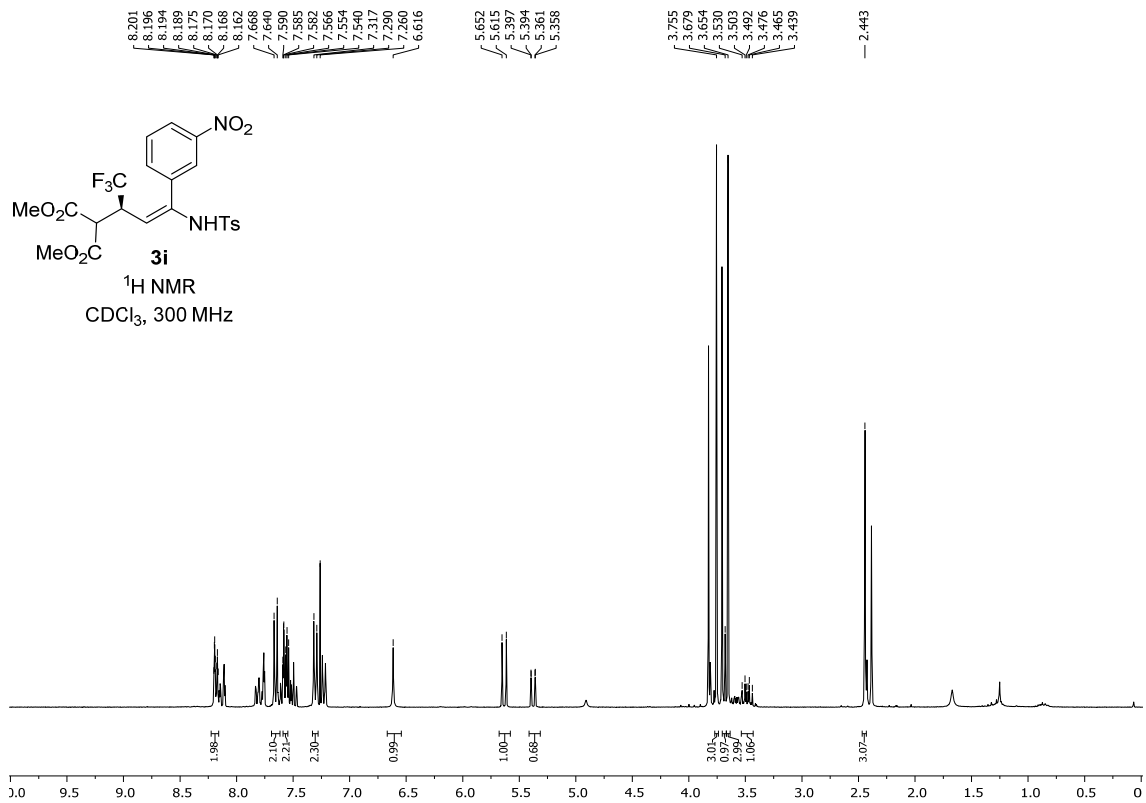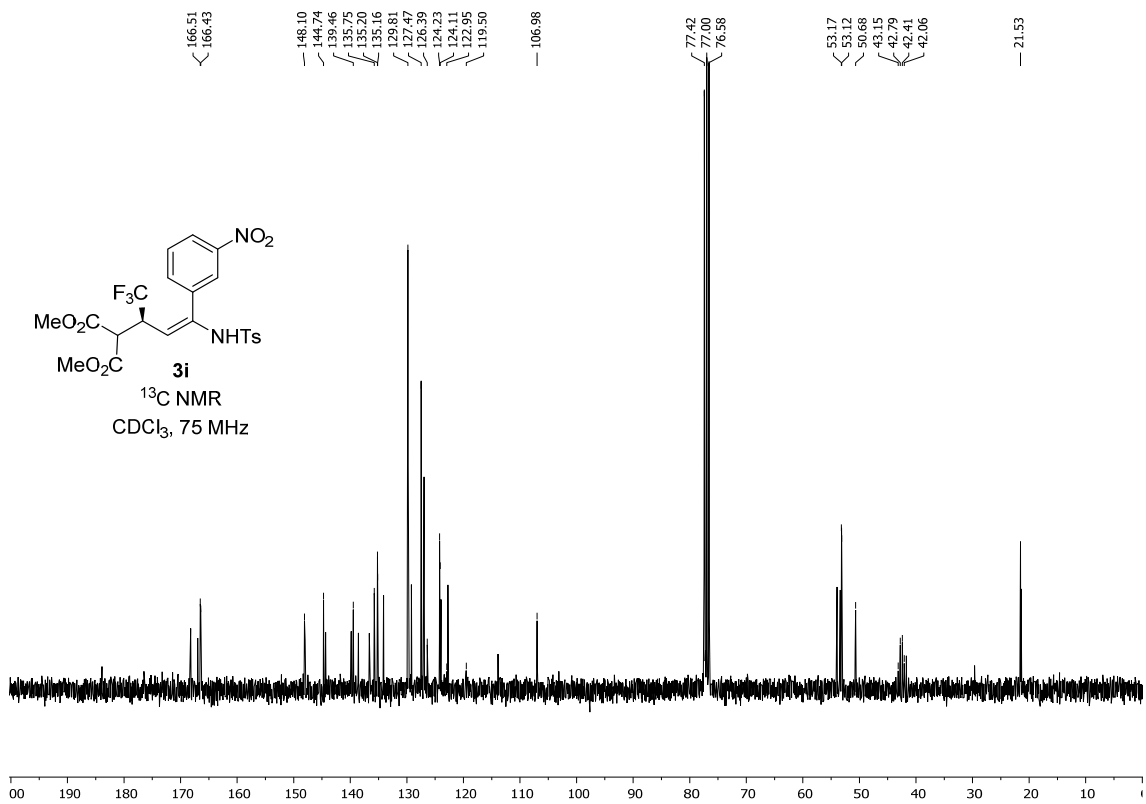

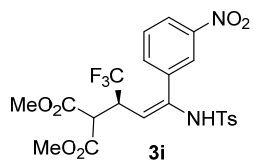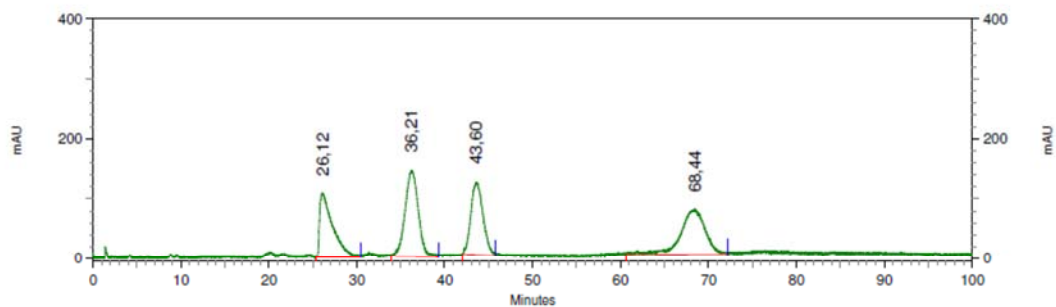

2: 240 nm, 4 nm Results

| Retention Time | Area     | Area Percent |
|----------------|----------|--------------|
| 26,12          | 44278354 | 20,864       |
| 36,21          | 60686427 | 28,596       |
| 43,60          | 47134471 | 22,210       |
| 68,44          | 60124210 | 28,331       |

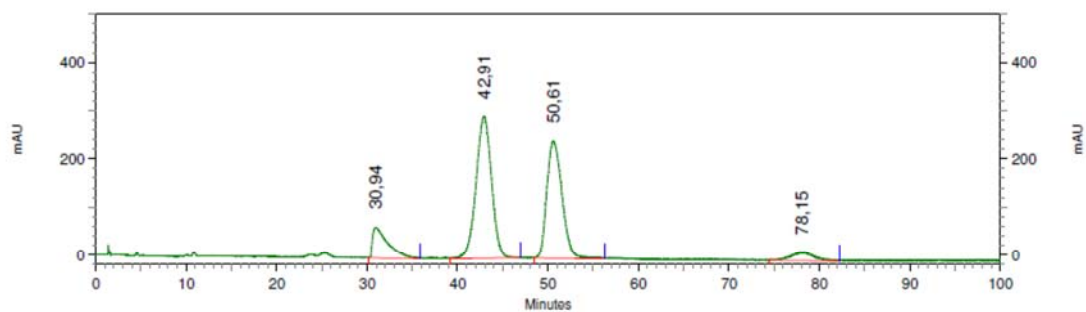

2: 240 nm, 4 nm Results

| Retention Time | Area      | Area Percent |
|----------------|-----------|--------------|
| 30,94          | 30715284  | 10,243       |
| 42,91          | 141508952 | 47,190       |
| 50,61          | 114674553 | 38,242       |
| 78,15          | 12969103  | 4,325        |

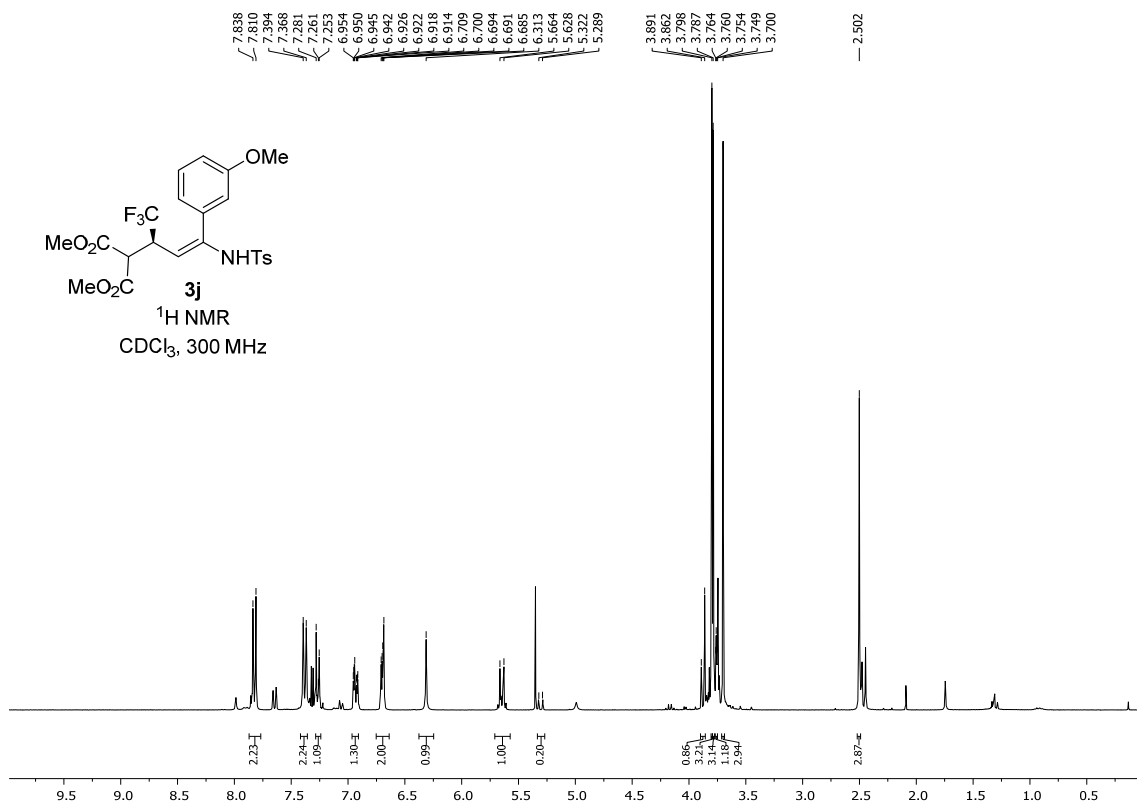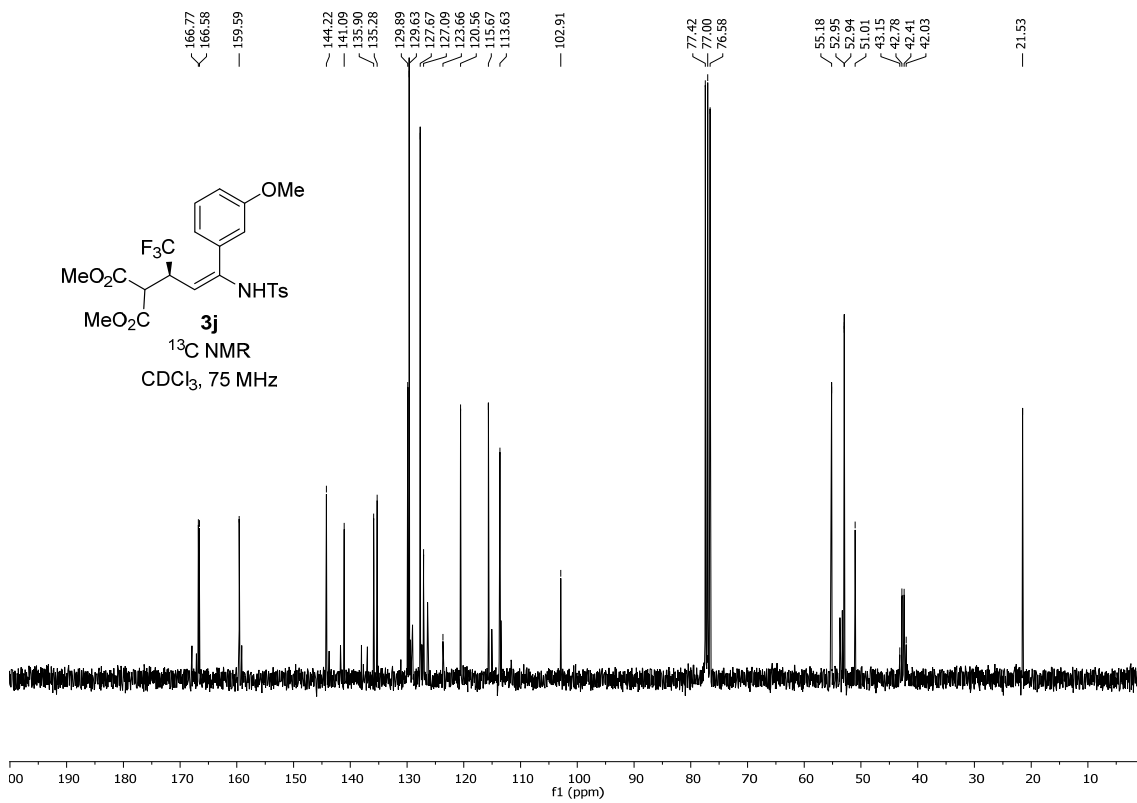

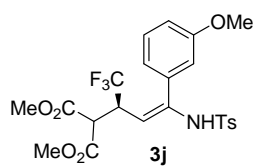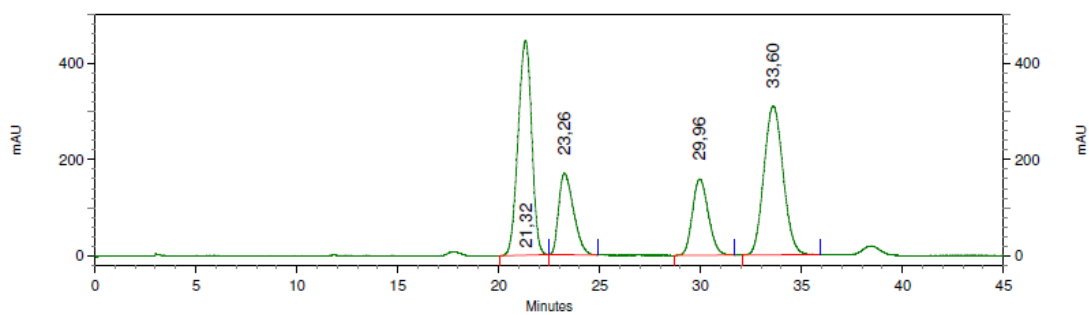

5: 250 nm, 4 nm Results

| Retention Time | Area     | Area Percent |
|----------------|----------|--------------|
| 21,32          | 83433064 | 35,597       |
| 23,26          | 34464298 | 14,704       |
| 29,96          | 34604433 | 14,764       |
| 33,60          | 81878917 | 34,934       |

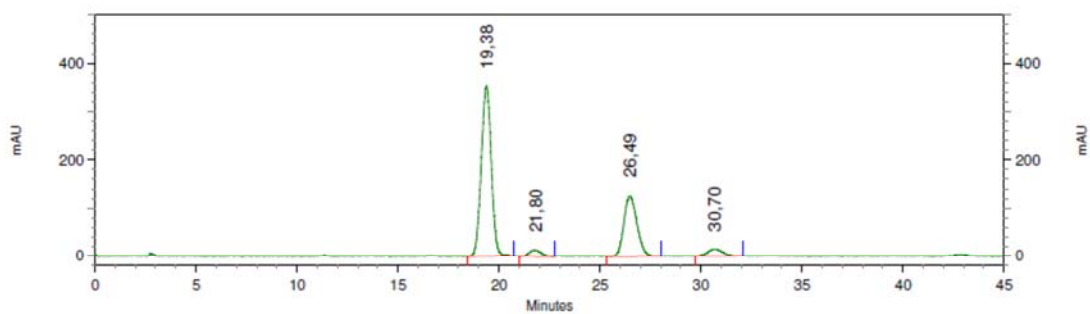

5: 250 nm, 4 nm Results

| Retention Time | Area     | Area Percent |
|----------------|----------|--------------|
| 19,38          | 49004176 | 63,381       |
| 21,80          | 2251250  | 2,912        |
| 26,49          | 22751614 | 29,426       |
| 30,70          | 3310239  | 4,281        |



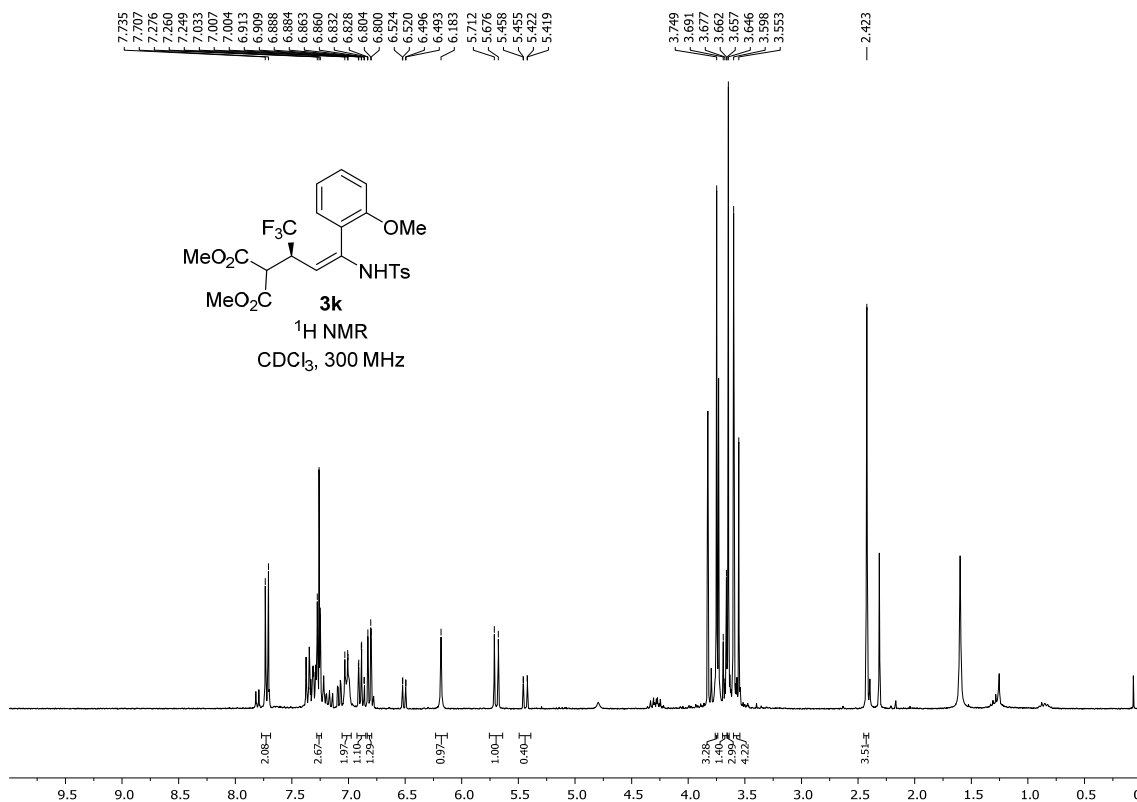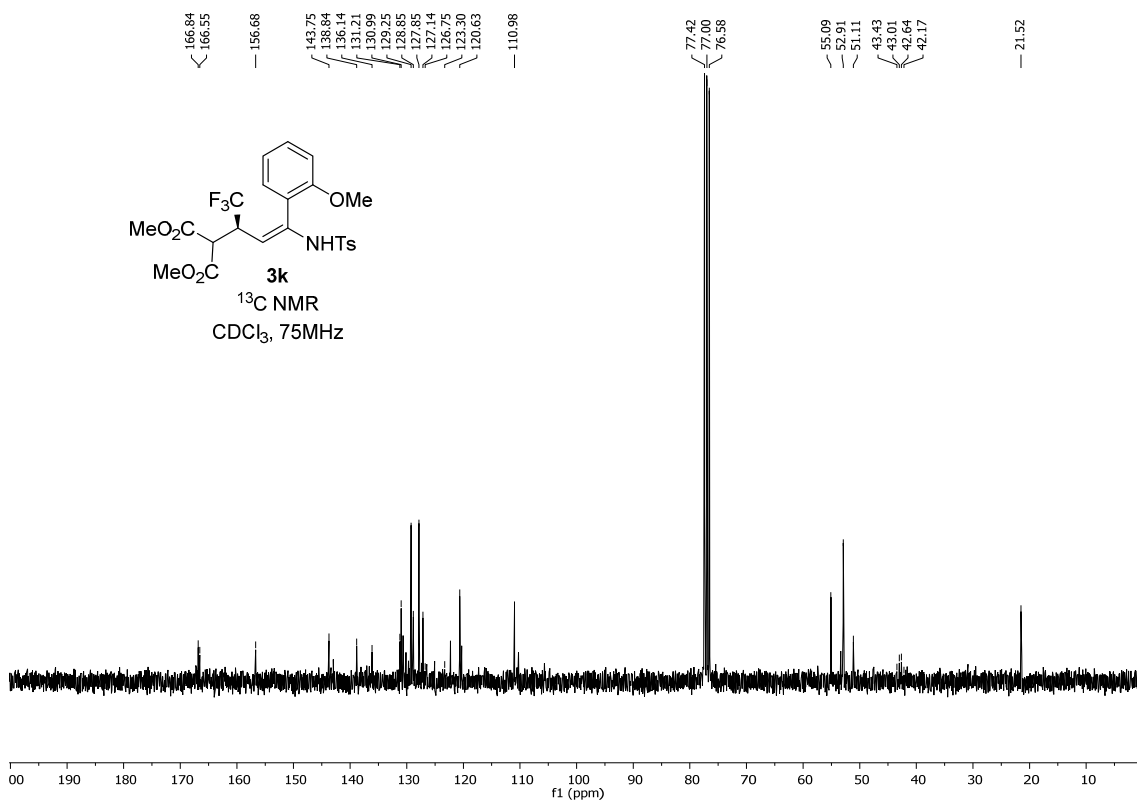

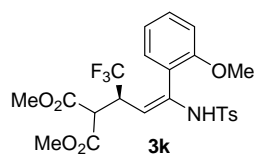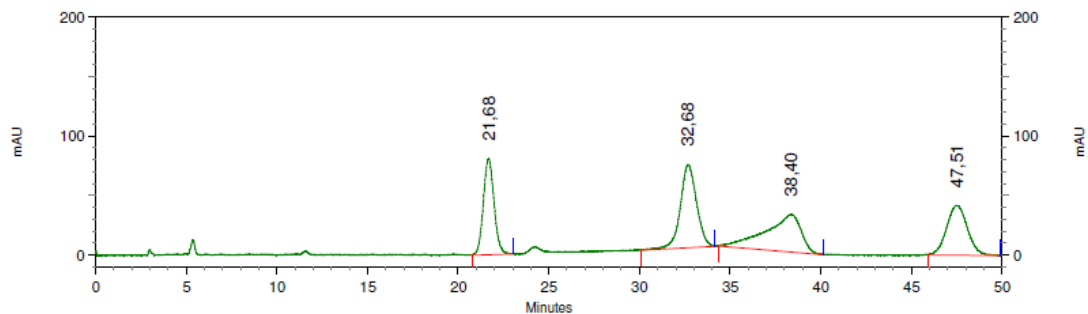

5: 250 nm, 4 nm Results

| Retention Time | Area     | Area Percent |
|----------------|----------|--------------|
| 21,68          | 13274995 | 21,691       |
| 32,68          | 17429237 | 28,479       |
| 38,40          | 17140324 | 28,007       |
| 47,51          | 13356633 | 21,824       |

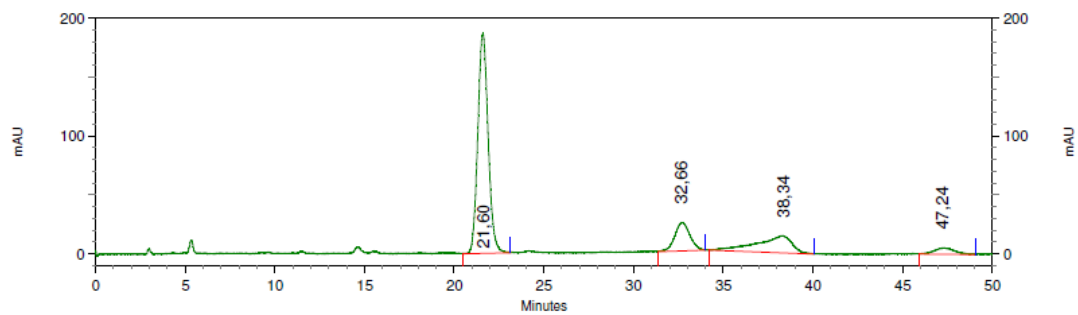

5: 250 nm, 4 nm Results

| Retention Time | Area     | Area Percent |
|----------------|----------|--------------|
| 21,60          | 29945092 | 65,926       |
| 32,66          | 5642658  | 12,423       |
| 38,34          | 8015853  | 17,647       |
| 47,24          | 1818970  | 4,005        |

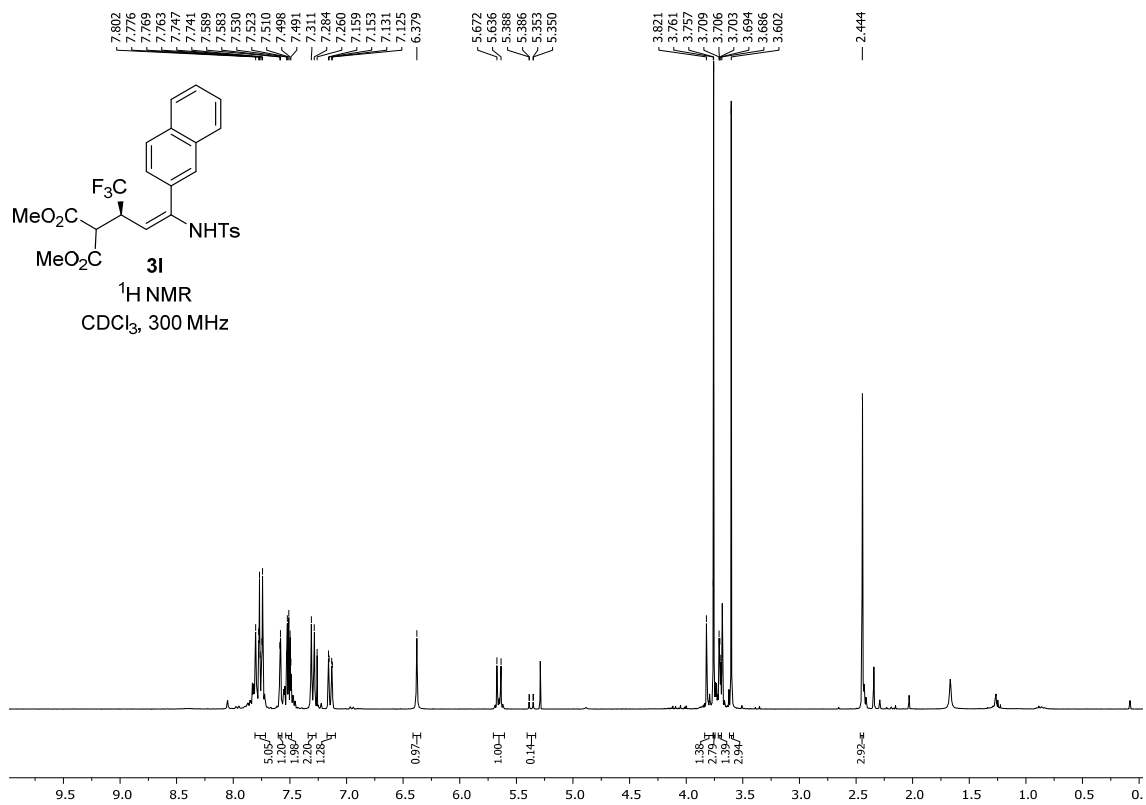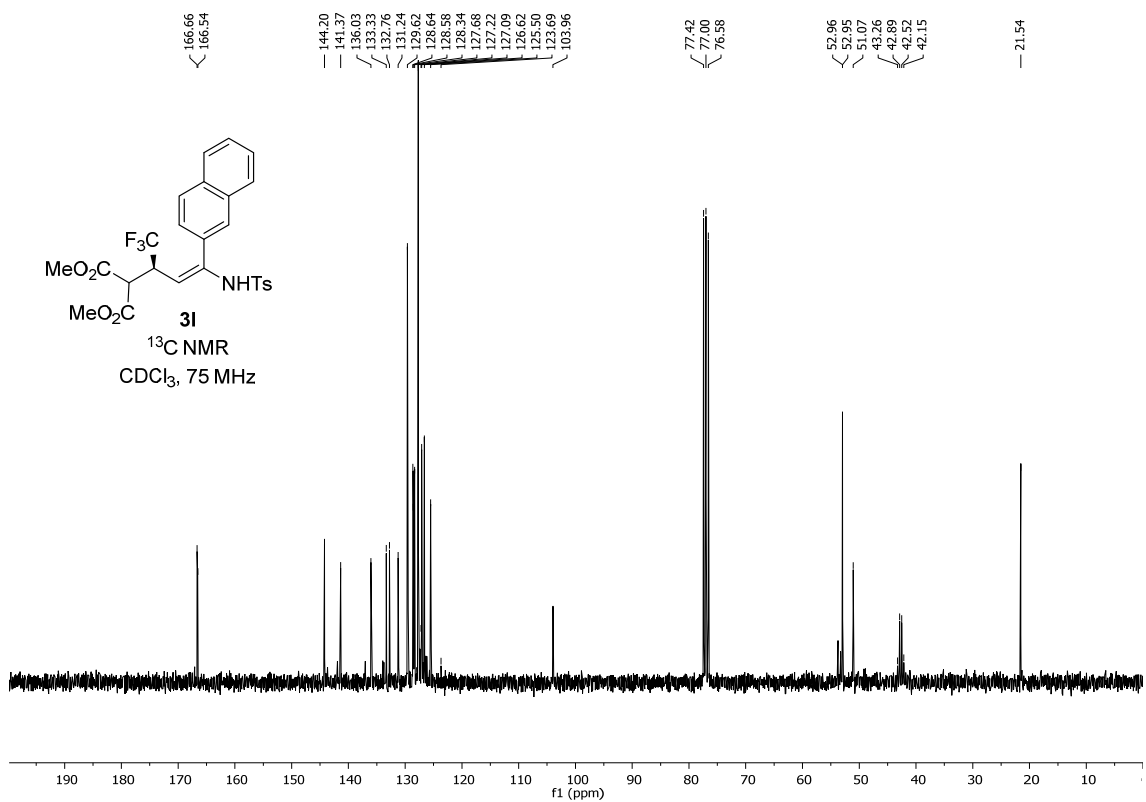

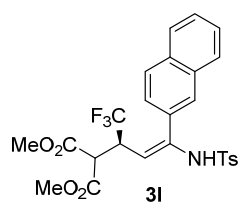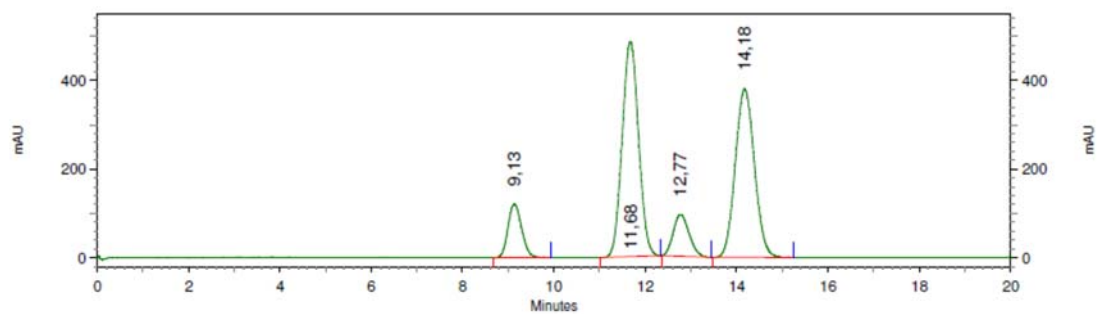

1: 280 nm, 4 nm Results

| Retention Time | Area     | Area Percent |
|----------------|----------|--------------|
| 9,13           | 10055071 | 8,990        |
| 11,68          | 48362788 | 43,240       |
| 12,77          | 9063996  | 8,104        |
| 14,18          | 44365277 | 39,666       |

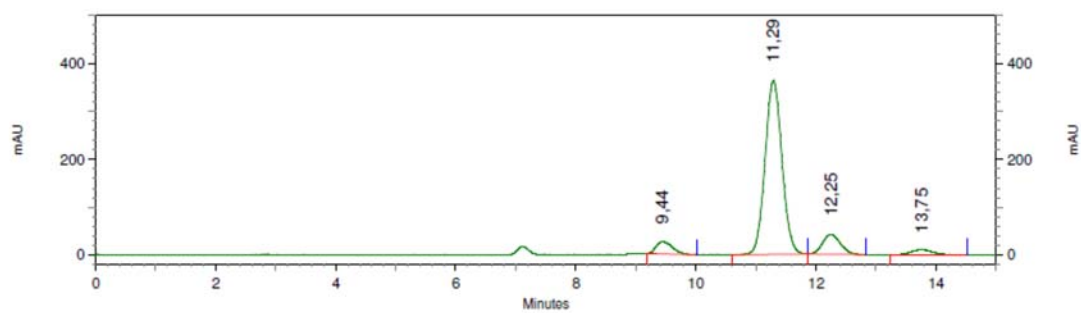

6: 280 nm, 4 nm Results

| Retention Time | Area     | Area Percent |
|----------------|----------|--------------|
| 9,44           | 1956733  | 5,608        |
| 11,29          | 28423861 | 81,464       |
| 12,25          | 3431501  | 9,835        |
| 13,75          | 1079387  | 3,094        |

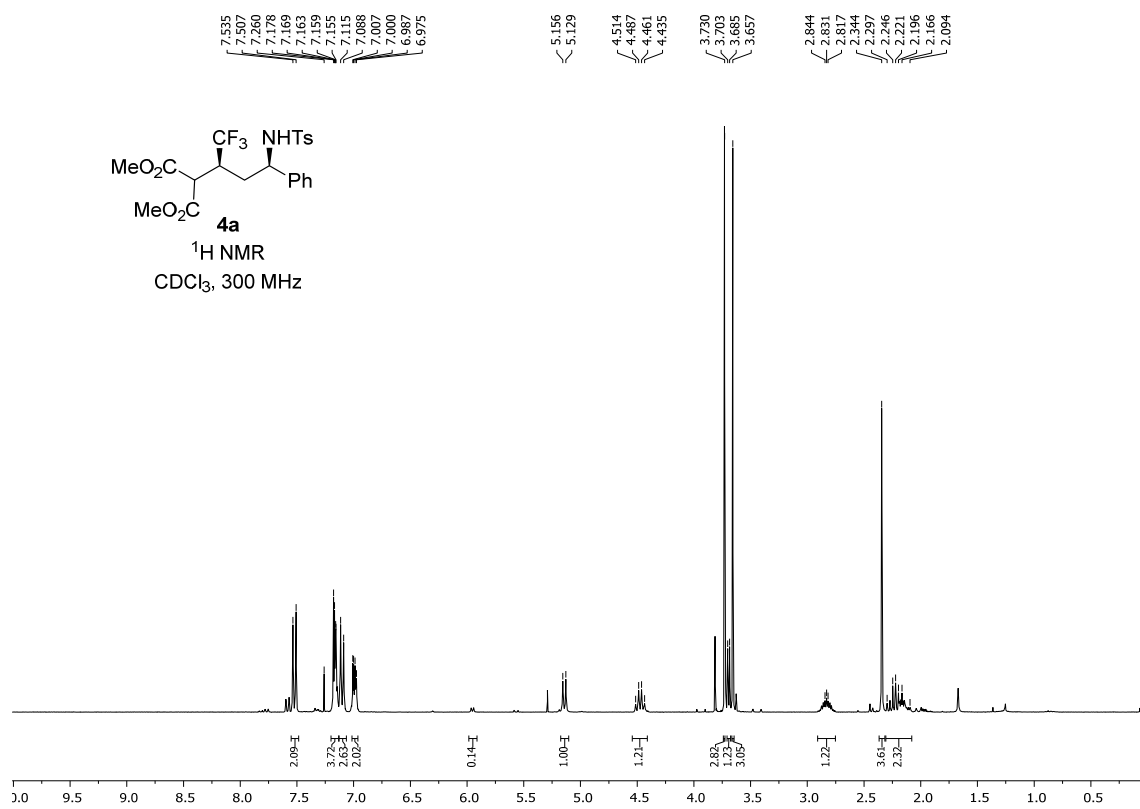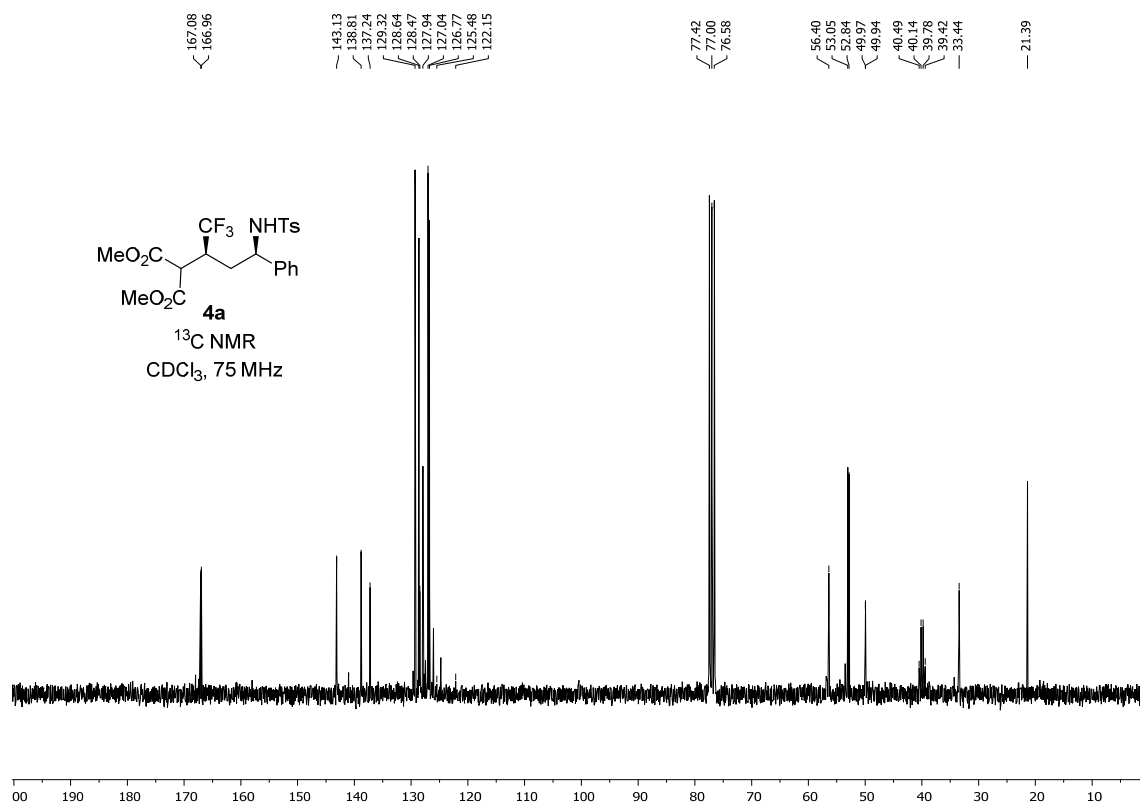

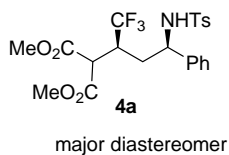

Lux-Amylose 1

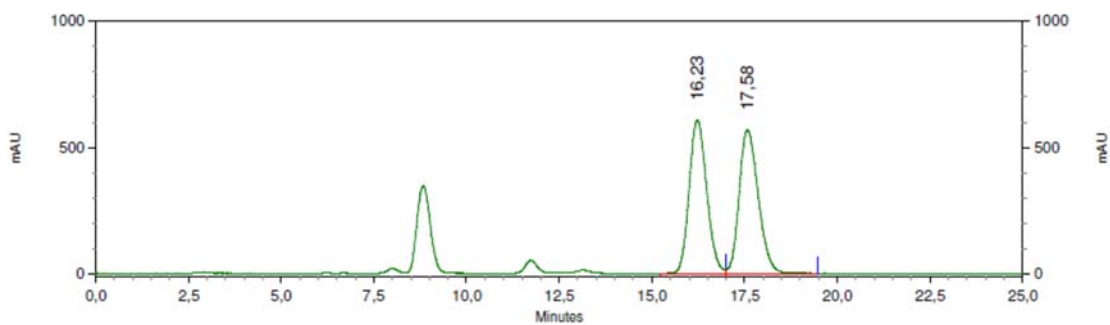

3: 240 nm, 4 nm Results

| Retention Time | Area     | Area Percent |
|----------------|----------|--------------|
| 16,23          | 80079138 | 49,517       |
| 17,58          | 81640326 | 50,483       |

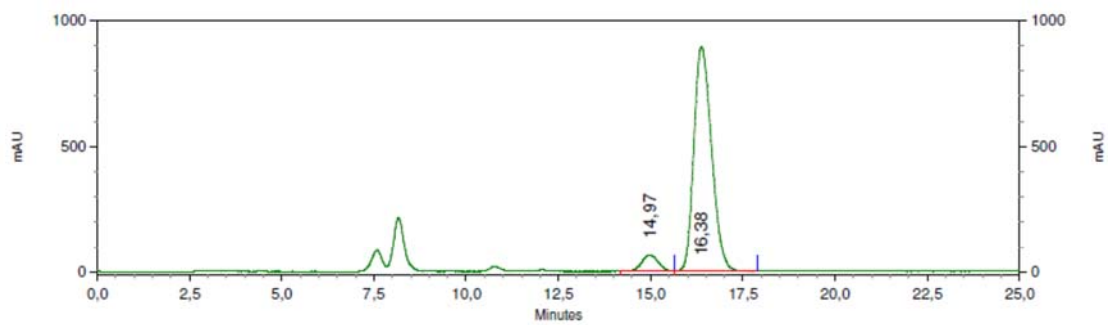

3: 240 nm, 4 nm Results

| Retention Time | Area      | Area Percent |
|----------------|-----------|--------------|
| 14,97          | 8051805   | 6,292        |
| 16,38          | 119921166 | 93,708       |

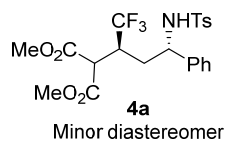

Chiralpak IC

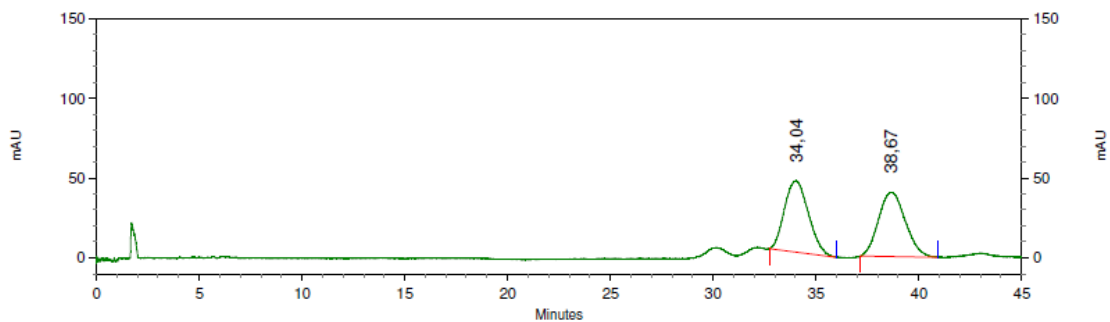

6: 220 nm, 4 nm Results

| Retention Time | Area     | Area Percent |
|----------------|----------|--------------|
| 34,04          | 14547165 | 49,809       |
| 38,67          | 14658732 | 50,191       |

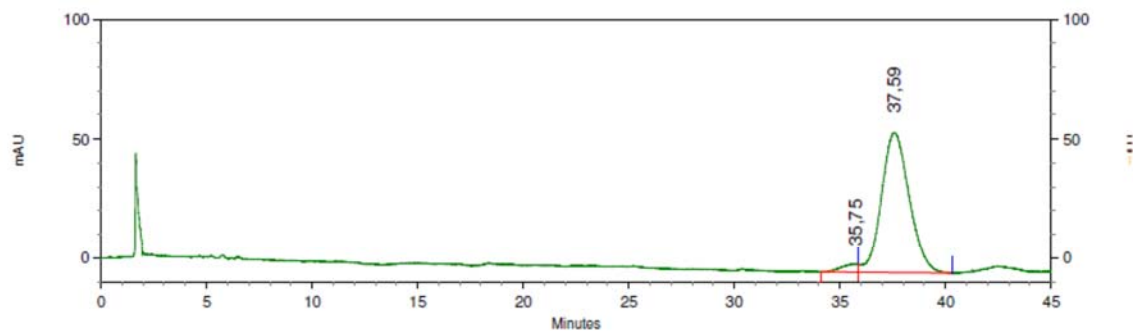

6: 220 nm, 4 nm Results

| Retention Time | Area     | Area Percent |
|----------------|----------|--------------|
| 35,75          | 696319   | 3,104        |
| 37,59          | 21738335 | 96,896       |

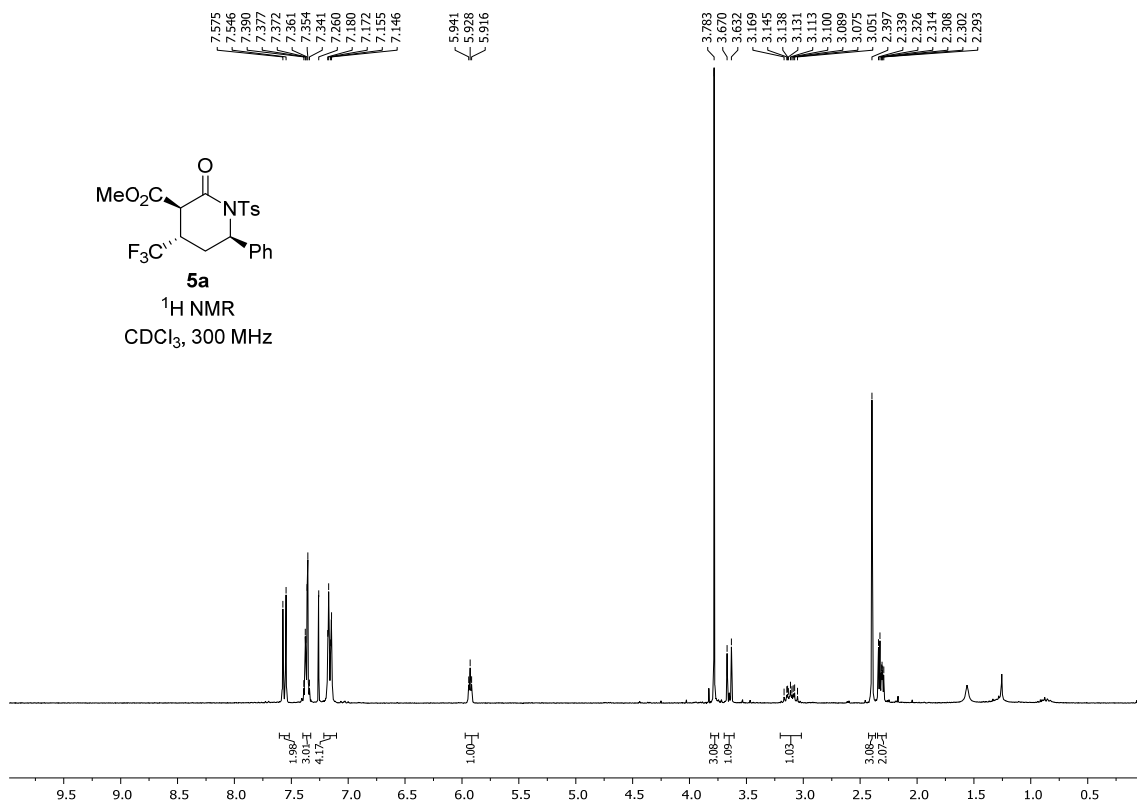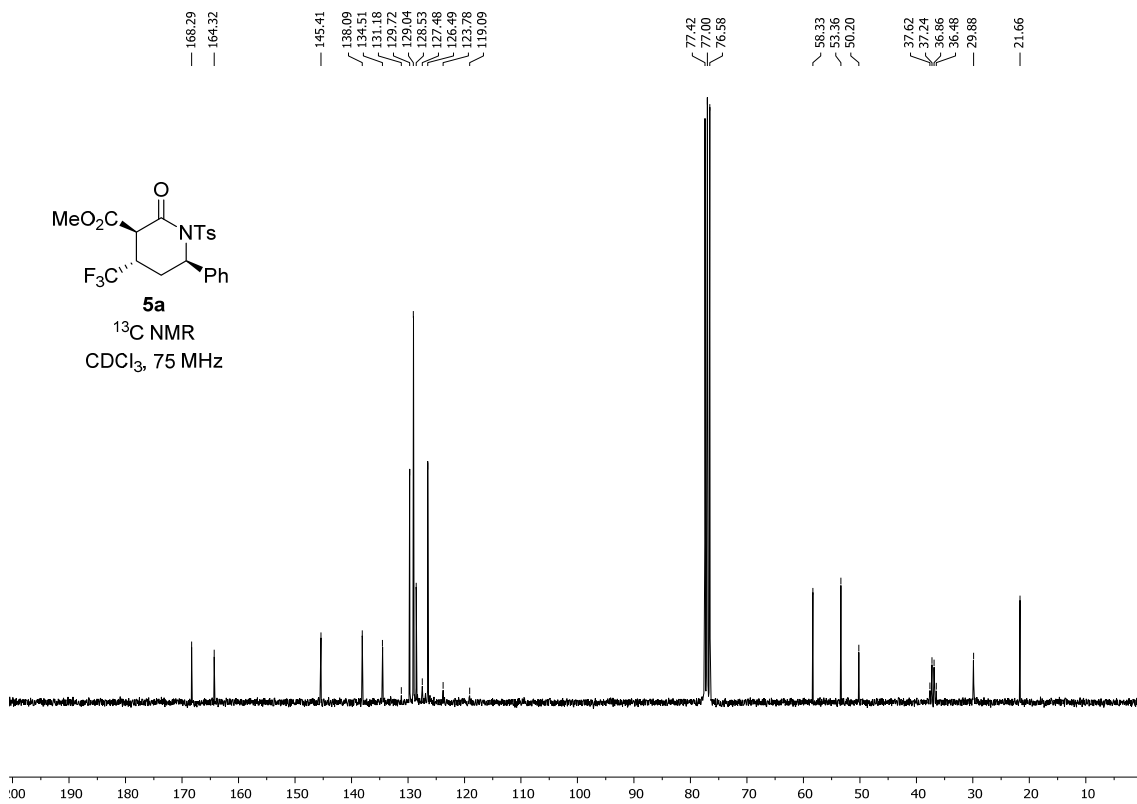



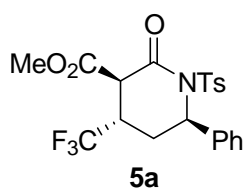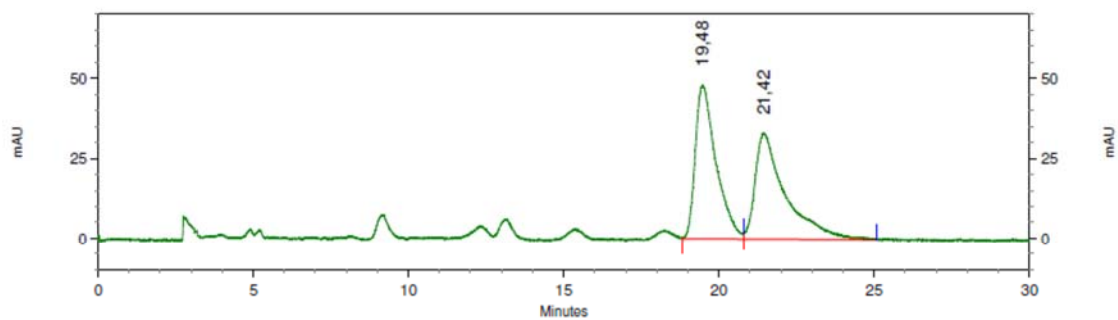

13: 250 nm, 4 nm  
Results

| Retention Time | Area    | Area Percent |
|----------------|---------|--------------|
| 19,48          | 8876376 | 49,765       |
| 21,42          | 8960049 | 50,235       |

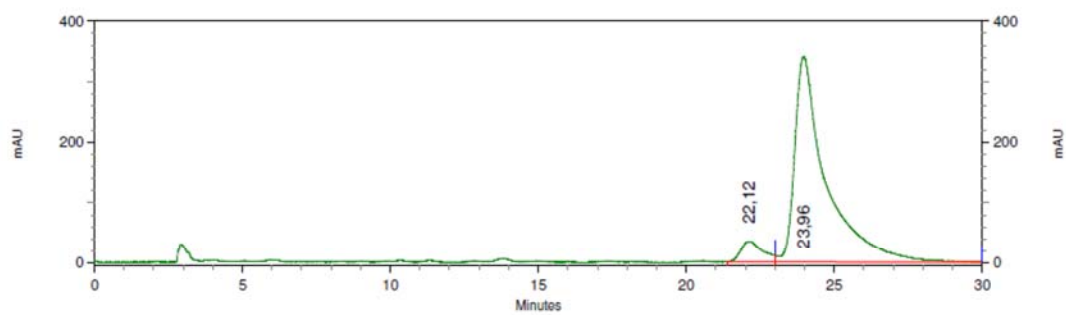

12: 220 nm, 4 nm  
Results

| Retention Time | Area      | Area Percent |
|----------------|-----------|--------------|
| 22,12          | 7086461   | 6,584        |
| 23,96          | 100551429 | 93,416       |

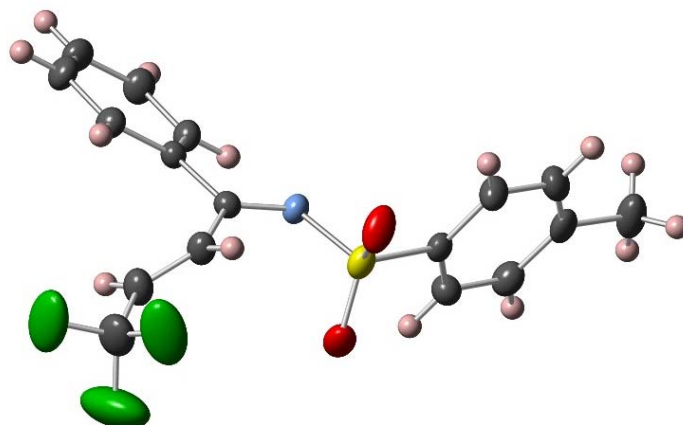

**Figure 2S.** Ortep plot for the X-ray structure of compound **2a**. The thermal ellipsoids are drawn at the 50% probability level.

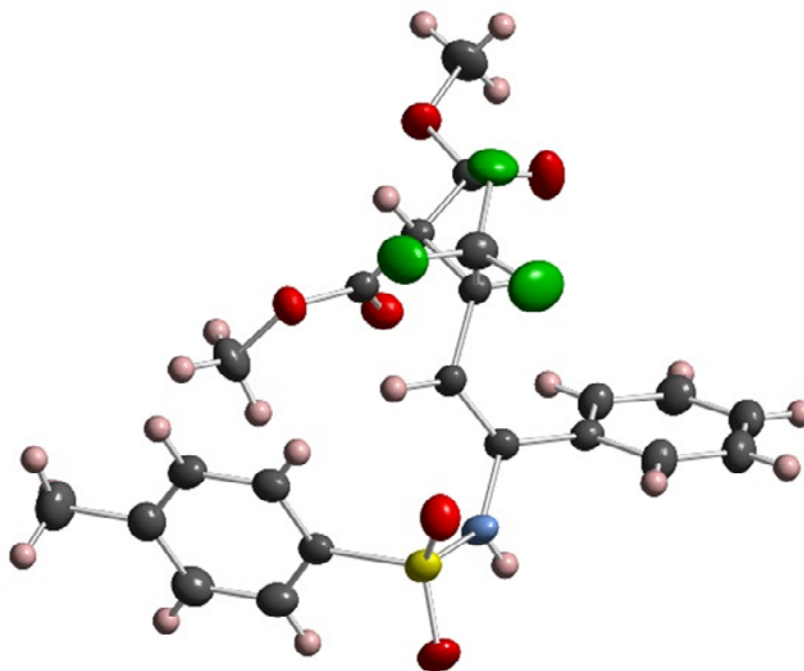

**Figure 3S.** Ortep plot for the X-ray structure of compound **3a**. The thermal ellipsoids are drawn at the 50% probability level.

Table S-1. Enantioselective conjugate addition of dimethyl malonate **2** to imine **2a** catalyzed by trivalent metal complexes.<sup>a</sup>

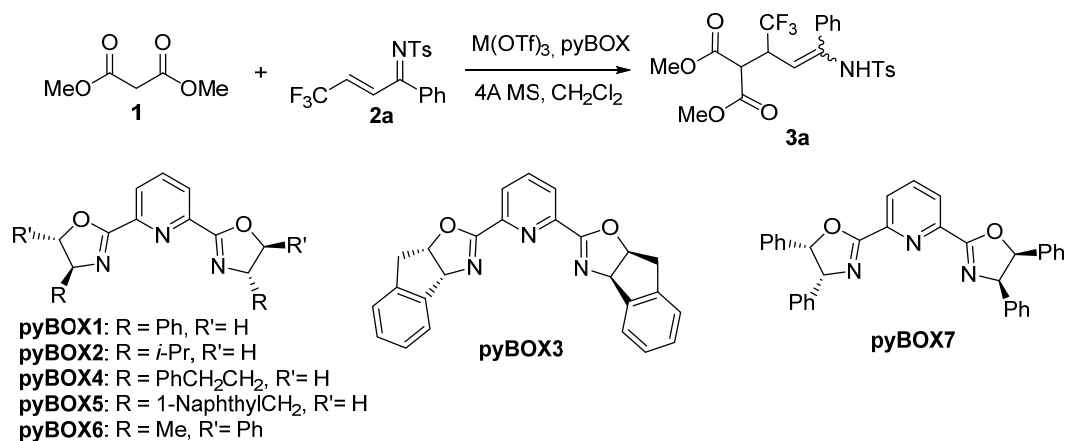

| Entry | La(OTf) <sub>3</sub> | pyBOX  | t (h) | Yield (%) <sup>[b]</sup> | dr ( <i>E</i> : <i>Z</i> ) | ee (%) ( <i>E</i> / <i>Z</i> ) <sup>c</sup> |
|-------|----------------------|--------|-------|--------------------------|----------------------------|---------------------------------------------|
| 1     | La(OTf) <sub>3</sub> | pyBOX1 | 16h   | >99                      | 72:28                      | 75/34                                       |
| 2     | La(OTf) <sub>3</sub> | pyBOX2 | 43h   | >99                      | 78:23                      | -15/-2                                      |
| 3     | La(OTf) <sub>3</sub> | pyBOX3 | 48    | >99                      | 77:23                      | 45/-3                                       |
| 4     | La(OTf) <sub>3</sub> | pyBOX4 | 40h   | >99                      | 82:18                      | -18/-9                                      |
| 5     | La(OTf) <sub>3</sub> | pyBOX5 | 40h   | >99                      | 82:18                      | -28/-11                                     |
| 6     | La(OTf) <sub>3</sub> | pyBOX6 | 37h   | 79                       | 89:11                      | -16/5                                       |
| 7     | La(OTf) <sub>3</sub> | pyBOX7 | 44h   | 86                       | 73:27                      | -76/-39                                     |
| 8     | Sc(OTf) <sub>3</sub> | pyBOX1 | 96    | -- <sup>d</sup>          | --                         | --                                          |
| 9     | Yb(OTf) <sub>3</sub> | pyBOX1 | 96    | 19                       | 43:57                      | 69/42                                       |
| 10    | In(OTf) <sub>3</sub> | pyBOX1 | 96    | -- <sup>d</sup>          | --                         | --                                          |

<sup>a</sup> Reaction conditions: **2** (0.3 mmol), **11** (0.12 mmol), ligand (0.012 mmol), M(OTf)<sub>3</sub> (0.012 mmol), 4Å MS (110 mg), CH<sub>2</sub>Cl<sub>2</sub> (1.1 mL). <sup>b</sup> Yield of isolated product. <sup>c</sup> Determined by HPLC with chiral stationary phases. <sup>d</sup> Little advance of the reaction was observed after the indicated time.
